# Supplementary material for: MRD as Biomarker for Response to Donor Lymphocyte Infusion after Allogeneic Hematopoietic Cell Transplantation in Patients with AML
Source: MDPI journal article supplement (doi:10.3390/cancers15153911), 2023-08-01
Supplement: s1 [file s1]

## MRD as biomarker for response to donor lymphocyte infusion after allogeneic hematopoietic cell transplantation in patients with AML

### Supplementary Data

### Supplementary Methods

**Supplementary Figure S1:** Mutation signatures were identified using the myeloid panel.

MRD was investigated before DLI, 30 days (FU30), and 90 days (FU90) after DLI using error-corrected next-generation sequencing (NGS-MRD).

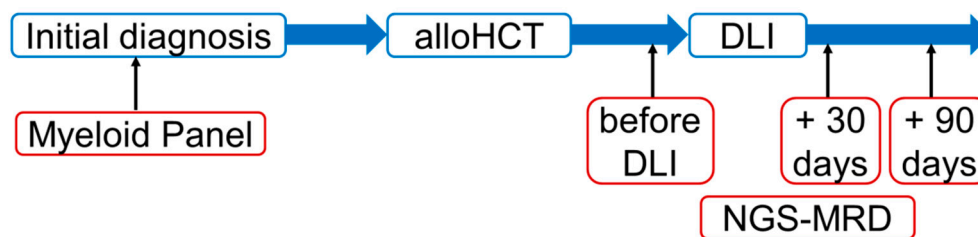

**Supplementary Figure S2:** Consort diagram showing remission and MRD status at time of DLI, 30 days and 90 days after DLI. DTA-genes were excluded as MRD markers. Patients not in CR/CRi at DLI include 4 patients without molecular marker (NGS<sup>-</sup>).

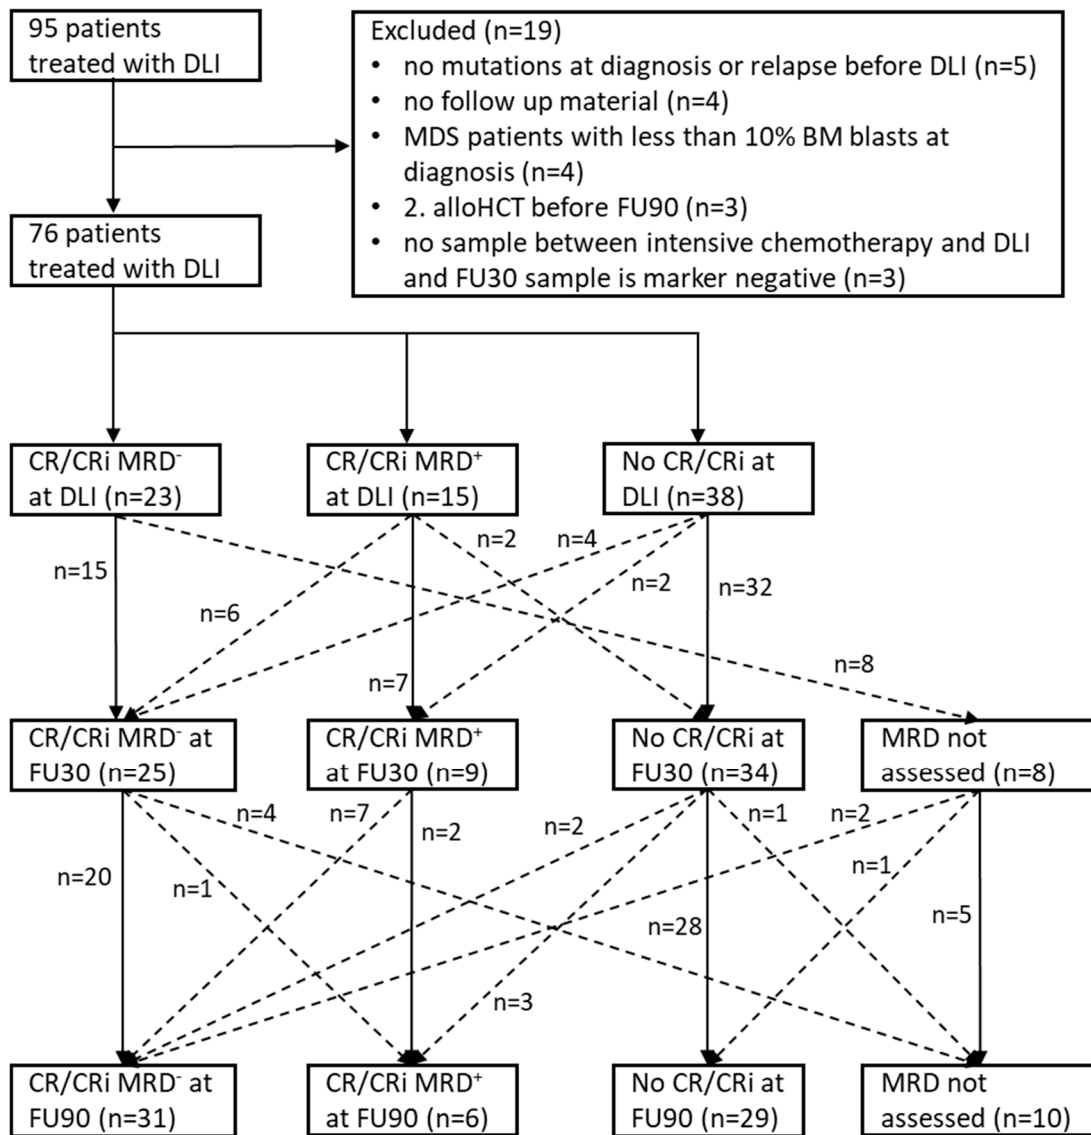

Abbreviations: CR, complete remission; CRi, CR with incomplete hematological recovery; DLI, donor lymphocyte infusion; FU30, follow up 30 days after first DLI; FU90, follow up 90 days after first DLI; MDS, myelodysplastic syndrome; MRD, measurable residual disease.

**Supplementary Table S1:** Genes included in our custom TruSight Myeloid Panel and Illumina custom enrichment panel (Nextera Flex for enrichment) (based on GRCh37/hg19). *ABCA1* and *GNB1* were exclusive to the Nextera Flex panel, but were not used for this patient cohort as mutations in these genes were not detected.

| Gene           | Exons    | Gene         | Exons           | Gene          | Exons                  |
|----------------|----------|--------------|-----------------|---------------|------------------------|
| <i>ABCA1</i>   | 2-50     | <i>FLT3</i>  | 14-16, 20       | <i>PTPN11</i> | 3, 13                  |
| <i>ASXL1</i>   | 12       | <i>GATA2</i> | 2-6             | <i>RAD21</i>  | complete               |
| <i>ASXL2</i>   | 11+12    | <i>GNB1</i>  | 3-11            | <i>RUNX1</i>  | complete               |
| <i>BCOR</i>    | complete | <i>IDH1</i>  | 4               | <i>SETBP1</i> | 4                      |
| <i>BCORL1</i>  | complete | <i>IDH2</i>  | 4               | <i>SF3B1</i>  | 13-16                  |
| <i>BRAF</i>    | Exon15   | <i>JAK2</i>  | 12, 14          | <i>SMC1A</i>  | 2, 11, 16, 17          |
| <i>CALR</i>    | 9        | <i>KDM6A</i> | complete        | <i>SMC3</i>   | 10, 13, 19, 23, 25, 28 |
| <i>CBL</i>     | 8, 9     | <i>KIT</i>   | 2, 8-11, 13, 17 | <i>SRSF2</i>  | 1                      |
| <i>CEBPA</i>   | complete | <i>KRAS</i>  | 2-5             | <i>STAG1</i>  | complete               |
| <i>CSF3R</i>   | 14-17    | <i>MPL</i>   | 10              | <i>STAG2</i>  | complete               |
| <i>CSNK1A1</i> | 3, 4     | <i>MYC</i>   | 2               | <i>TET2</i>   | 3-11                   |
| <i>DDX41</i>   | complete | <i>NF1</i>   | complete        | <i>TP53</i>   | 2-11                   |
| <i>DNMT3A</i>  | complete | <i>NPM1</i>  | 12              | <i>U2AF1</i>  | 2, 6                   |
| <i>ETNK1</i>   | 3        | <i>NRAS</i>  | 2-5             | <i>WT1</i>    | 7, 9                   |
| <i>ETV6</i>    | complete | <i>PHF6</i>  | complete        | <i>ZBTB7A</i> | 2, 3                   |
| <i>EZH2</i>    | complete | <i>PPM1D</i> | 1-6             | <i>ZRSR2</i>  | complete               |

**Supplementary Table S2:** Genes included in mutational classes.

| Mutational class                 | Genes                                                                                                                                                           |
|----------------------------------|-----------------------------------------------------------------------------------------------------------------------------------------------------------------|
| Epigenetic or chromatin modifier | <i>ASXL1</i> , <i>ASXL2</i> , <i>DNMT3A</i> , <i>EZH2</i> , <i>IDH1</i> , <i>IDH2</i> , <i>KDM6A</i> , <i>KMT2A</i> , <i>TET2</i>                               |
| Nucleophosmin                    | <i>NPM1</i>                                                                                                                                                     |
| Cohesin complex                  | <i>RAD21</i> , <i>SMC1A</i> , <i>SMC3</i> , <i>STAG1</i> , <i>STAG2</i>                                                                                         |
| Signal transduction              | <i>CBL</i> , <i>ETNK1</i> , <i>FLT3</i> , <i>JAK2</i> , <i>KIT</i> , <i>KRAS</i> , <i>NF1</i> , <i>NRAS</i> , <i>PTPN11</i>                                     |
| Spliceosome                      | <i>DDX41</i> , <i>SF3B1</i> , <i>SRSF1</i> , <i>U2AF1</i> , <i>ZBTB7A</i> , <i>ZRSR2</i>                                                                        |
| Myeloid transcription factor     | <i>BCOR</i> , <i>BCORL1</i> , <i>CEBPA</i> , <i>CUX1</i> , <i>ETV6</i> , <i>GATA2</i> , <i>MYC</i> , <i>NOTCH1</i> , <i>PHF6</i> , <i>RUNX1</i> , <i>SETBP1</i> |
| Tumor suppressor                 | <i>PPM1D</i> , <i>TP53</i> , <i>WT1</i>                                                                                                                         |

**Supplementary Table S3:** Treatment- and transplantation-associated characteristics of patients who were in CR/CRi and MRD<sup>-</sup> at DLI, patients who were in CR/CRi and MRD<sup>+</sup> at DLI and patients who were not in CR/CRi at DLI.

| Characteristic                                | All (n=76) | CR/CRi + MRD <sup>-</sup> (n=23) | CR/CRi + MRD <sup>+</sup> (n=15) | no CR/CRi at DLI (n=38) | p    | p (MRD <sup>-</sup> vs. MRD <sup>+</sup> ) |
|-----------------------------------------------|------------|----------------------------------|----------------------------------|-------------------------|------|--------------------------------------------|
| Number of chemotherapy cycles before alloHCT1 |            |                                  |                                  |                         | 0.06 | 0.13                                       |
| 0-1 cycles – no. (%)                          | 11 (14)    | 3 (13)                           | 5 (33)                           | 3 (8)                   |      |                                            |
| ≥2 – no. (%)                                  | 65 (86)    | 20 (87)                          | 10 (67)                          | 35 (92)                 |      |                                            |
| DRI score grouped                             |            |                                  |                                  |                         | 0.97 | 0.96                                       |
| Low + intermediate – no. (%)                  | 47 (62)    | 14 (61)                          | 9 (60)                           | 24 (63)                 |      |                                            |
| High + very high – no. (%)                    | 29 (38)    | 9 (39)                           | 6 (40)                           | 14 (37)                 |      |                                            |
| Remission status at alloHCT1                  |            |                                  |                                  |                         | 0.12 | 0.037                                      |
| First CR – no. (%)                            | 34 (45)    | 12 (52)                          | 3 (20)                           | 19 (50)                 |      |                                            |
| CRi – no. (%)                                 | 2 (3)      | 1 (4)                            | 1 (7)                            | 0 (0)                   |      |                                            |
| Partial remission – no. (%)                   | 7 (9)      | 2 (9)                            | 1 (7)                            | 4 (10)                  |      |                                            |
| Second CR – no. (%)                           | 11 (14)    | 0 (0)                            | 5 (33)                           | 6 (16)                  |      |                                            |
| No CR/CRi/PR – no. (%)                        | 22 (29)    | 8 (35)                           | 5 (33)                           | 9 (24)                  |      |                                            |
| Donor match at alloHCT1                       |            |                                  |                                  |                         | 0.42 | 0.95                                       |
| MRD – no. (%)                                 | 25 (33)    | 10 (43)                          | 6 (40)                           | 9 (24)                  |      |                                            |
| MUD – no. (%)                                 | 36 (47)    | 8 (35)                           | 6 (40)                           | 22 (58)                 |      |                                            |
| MMRD or MMUD – no. (%)                        | 15 (20)    | 5 (22)                           | 3 (20)                           | 7 (18)                  |      |                                            |
| Conditioning therapy alloHCT1                 |            |                                  |                                  |                         | 0.61 | 0.33                                       |
| Myeloablative – no. (%)                       | 23 (30)    | 8 (35)                           | 3 (20)                           | 12 (32)                 |      |                                            |
| Reduced intensity – no. (%)                   | 53 (70)    | 15 (65)                          | 12 (80)                          | 26 (68)                 |      |                                            |
| Stem cell source at alloHCT1                  |            |                                  |                                  |                         | 0.11 | 0.13                                       |
| PB – no. (%)                                  | 64 (84)    | 20 (87)                          | 10 (67)                          | 34 (89)                 |      |                                            |
| BM – no. (%)                                  | 12 (16)    | 3 (13)                           | 5 (33)                           | 4 (11)                  |      |                                            |
| Donor sex alloHCT1                            |            |                                  |                                  |                         | 0.08 | 0.026                                      |
| Male – no. (%)                                | 43 (57)    | 10 (43)                          | 12 (80)                          | 21 (55)                 |      |                                            |
| Female – no. (%)                              | 33 (43)    | 13 (57)                          | 3 (20)                           | 17 (45)                 |      |                                            |
| Donor age alloHCT1                            |            |                                  |                                  |                         | 0.31 | 0.045                                      |
| Median (years)                                | 37         | 44                               | 33.9                             | 36                      |      |                                            |
| Range (years)                                 | 14.9-64.4  | 14.9-58.7                        | 22.3-58.6                        | 21.1-64.4               |      |                                            |
| Missing – no. (%)                             | 1 (1)      | 1 (4)                            | 0 (0)                            | 0 (0)                   |      |                                            |
| Patient age alloHCT1                          |            |                                  |                                  |                         | 0.19 | 0.91                                       |
| Median (years)                                | 53.2       | 50.3                             | 53.1                             | 56.9                    |      |                                            |
| Range (years)                                 | 17.9-68    | 18.5-68                          | 30-67                            | 17.9-66                 |      |                                            |
| CMV status alloHCT1                           |            |                                  |                                  |                         | 0.83 | 0.82                                       |

|                                        |          |          |          |          |        |      |
|----------------------------------------|----------|----------|----------|----------|--------|------|
| Patient neg. /Donor neg. – no. (%)     | 26 (34)  | 8 (35)   | 6 (40)   | 12 (32)  |        |      |
| Any other constellation – no. (%)      | 49 (65)  | 14 (61)  | 9 (60)   | 26 (68)  |        |      |
| Missing – no. (%)                      | 1 (1)    | 1 (4)    | 0 (0)    | 0 (0)    |        |      |
| Acute GvHD after alloHCT1 before DLI   |          |          |          |          | 0.1    | 0.06 |
| Yes – no. (%)                          | 23 (30)  | 3 (13)   | 6 (40)   | 14 (37)  |        |      |
| No – no. (%)                           | 53 (70)  | 20 (87)  | 9 (60)   | 24 (63)  |        |      |
| Acute GvHD after alloHCT1 grade        |          |          |          |          | 0.72   | -    |
| Grade I or II – no. (%)                | 22 (96)  | 3 (100)  | 6 (100)  | 13 (93)  |        |      |
| Grade III or IV – no. (%)              | 1 (4)    | 0 (0)    | 0 (0)    | 1 (7)    |        |      |
| Chronic GvHD after alloHCT1 before DLI |          |          |          |          | 0.32   | 0.14 |
| Yes – no. (%)                          | 14 (18)  | 2 (9)    | 4 (17)   | 8 (21)   |        |      |
| No – no. (%)                           | 62 (82)  | 21 (91)  | 11 (73)  | 30 (79)  |        |      |
| Chronic GvHD after alloHCT1 max. grade |          |          |          |          | 0.67   | -    |
| Limited – no. (%)                      | 13 (93)  | 2 (100)  | 4 (100)  | 7 (88)   |        |      |
| Extensive – no. (%)                    | 1 (7)    | 0 (0)    | 0 (0)    | 1 (12)   |        |      |
| Type of first DLI                      |          |          |          |          | <0.001 | 0.06 |
| pDLI – no. (%)                         | 30 (39)  | 20 (87)  | 9 (60)   | 1 (3)    |        |      |
| tDLI – no. (%)                         | 46 (61)  | 3 (13)   | 6 (40)   | 37 (97)  |        |      |
| WBC count at DLI                       |          |          |          |          | <0.001 | 0.99 |
| Median – (x 10 <sup>9</sup> /l)        | 3.9      | 4.9      | 5.5      | 1.7      |        |      |
| Range – (x 10 <sup>9</sup> /l)         | 0-19     | 1.4-11.9 | 1.3-8.2  | 0-19     |        |      |
| Missing – no. (%)                      | 1 (1)    | 1 (4)    | 0 (0)    | 0 (0)    |        |      |
| Hemoglobin at DLI                      |          |          |          |          | <0.001 | 0.48 |
| Median – g/dL                          | 10.3     | 11.9     | 12.5     | 9.2      |        |      |
| Range – g/dL                           | 6.8-15.3 | 7.6-15.3 | 9.2-14.9 | 6.8-14.2 |        |      |
| Missing – no. (%)                      | 1 (1)    | 1 (4)    | 0 (0)    | 0 (0)    |        |      |
| Platelet count at DLI                  |          |          |          |          | <0.001 | 0.69 |
| Median – (x 10 <sup>9</sup> /l)        | 69       | 127      | 144      | 22.5     |        |      |
| Range – (x 10 <sup>9</sup> /l)         | 0-274    | 12-241   | 31-274   | 0-192    |        |      |
| Missing – no. (%)                      | 1 (1)    | 1 (4)    | 0 (0)    | 0 (0)    |        |      |
| Blasts PB at DLI                       |          |          |          |          | <0.001 | 1    |
| Median – %                             | 0        | 0        | 0        | 0.9      |        |      |
| Range – %                              | 0-75     | 0        | 0        | 0-75     |        |      |
| Missing – no. (%)                      | 1 (1)    | 1 (4)    | 0 (0)    | 0 (0)    |        |      |
| Blasts BM at DLI                       |          |          |          |          | 0.034  | 0.61 |
| Median – %                             | 5        | 0        | 3        | 7        |        |      |
| Range – %                              | 0-80     | 0-5      | 0-5      | 0-80     |        |      |
| Missing – no. (%)                      | 51 (67)  | 20 (87)  | 8 (53)   | 23 (61)  |        |      |

|                                   |           |           |           |           |        |       |
|-----------------------------------|-----------|-----------|-----------|-----------|--------|-------|
| Time between alloHCT and DLI      |           |           |           |           | 0.003  | 0.036 |
| Median (months)                   | 7.4       | 5.1       | 9.1       | 8.9       |        |       |
| Range – %                         | 3.1-74.7  | 3.7-21.4  | 3.1-26    | 3.3-74.7  |        |       |
| Donor chimerism BM at DLI         |           |           |           |           | 0.022  | 0.21  |
| Median – %                        | 96        | 99.8      | 93.5      | 92        |        |       |
| Range – %                         | 9-100     | 99-100    | 78-100    | 9-100     |        |       |
| Missing – no. (%)                 | 45 (59)   | 19 (83)   | 11 (73)   | 15 (39)   |        |       |
| Donor chimerism PB at DLI         |           |           |           |           | <0.001 | 0.35  |
| Median – %                        | 99.85     | 100       | 99.9      | 96.8      |        |       |
| Range – %                         | 19-100    | 77-100    | 91-100    | 19-100    |        |       |
| Missing – no. (%)                 | 4 (5)     | 1 (4)     | 1 (7)     | 2 (5)     |        |       |
| Number of DLIs until FU90         |           |           |           |           | 0.05   | 0.08  |
| 1 – no. (%)                       | 33 (43)   | 13 (56)   | 3 (20)    | 17 (45)   |        |       |
| 2 – no. (%)                       | 25 (33)   | 8 (35)    | 9 (60)    | 8 (21)    |        |       |
| 3 – no. (%)                       | 16 (21)   | 2 (9)     | 3 (20)    | 11 (29)   |        |       |
| 4 – no. (%)                       | 2 (3)     | 0 (0)     | 0 (0)     | 2 (5)     |        |       |
| DLI starting dose                 |           |           |           |           | <0.001 | 0.91  |
| Median (*10 <sup>5</sup> CD3+/kg) | 62.5      | 10        | 50        | 100       |        |       |
| Range (*10 <sup>5</sup> CD3+/kg)  | 0.3-210   | 5-160     | 0.3-200   | 0.5-210   |        |       |
| DLI total dose until FU90         |           |           |           |           | 0.002  | 0.34  |
| Median (*10 <sup>5</sup> CD3+/kg) | 102       | 55        | 150       | 167       |        |       |
| Range (*10 <sup>5</sup> CD3+/kg)  | 0.3-50750 | 5-600     | 0.3-1530  | 16-50750  |        |       |
| Missing – no. (%)                 | 1 (1)     | 0 (0)     | 0 (0)     | 1 (3)     |        |       |
| Age at DLI                        |           |           |           |           | 0.1    | 0.84  |
| Median (years)                    | 54.1      | 52        | 53.7      | 57.9      |        |       |
| Range (years)                     | 18.9-68.9 | 19.1-68.4 | 30.9-67.7 | 18.9-68.9 |        |       |
| Donor chimerism PB after DLI      |           |           |           |           | <0.001 | 0.83  |
| Median – %                        | 99.99     | 100       | 100       | 92.5      |        |       |
| Range – %                         | 12-100    | 91.2-100  | 80.9-100  | 12-100    |        |       |
| Missing – no. (%)                 | 26 (34)   | 6 (26)    | 2 (13)    | 18 (47)   |        |       |
| Acute GvHD after DLI1             |           |           |           |           | 0.32   | 0.13  |
| Yes – no. (%)                     | 14 (18)   | 6 (26)    | 1 (7)     | 7 (18)    |        |       |
| No – no. (%)                      | 62 (82)   | 17 (74)   | 14 (93)   | 31 (82)   |        |       |
| Acute GvHD after DLI1 max grade   |           |           |           |           | 0.46   | 0.21  |
| Grade I or II – no. (%)           | 8 (57)    | 4 (67)    | 0 (0)     | 4 (57)    |        |       |
| Grade III or IV – no. (%)         | 6 (43)    | 2 (33)    | 0 (0)     | 3 (43)    |        |       |
| Chronic GvHD after DLI1           |           |           |           |           | 0.08   | 0.05  |
| Yes – no. (%)                     | 8 (11)    | 5 (22)    | 0 (0)     | 3 (8)     |        |       |
| No – no. (%)                      | 68 (89)   | 18 (78)   | 15 (100)  | 35 (92)   |        |       |
| Chronic GvHD after DLI1 max.      |           |           |           |           |        | -     |

|                                        |         |         |         |         |        |      |
|----------------------------------------|---------|---------|---------|---------|--------|------|
| grade                                  |         |         |         |         | 0.67   |      |
| Limited – no. (%)                      | 6 (75)  | 4 (80)  | 0 (0)   | 2 (67)  |        |      |
| Extensive – no. (%)                    | 2 (25)  | 1 (20)  | 0 (0)   | 1 (33)  |        |      |
| AlloHCT2 after DLI1                    |         |         |         |         | 0.06   | 0.12 |
| Yes – no. (%)                          | 5 (7)   | 1 (4)   | 3 (20)  | 1 (3)   |        |      |
| No – no. (%)                           | 71 (93) | 22 (96) | 12 (80) | 37 (97) |        |      |
| CMV reactivation after DLI             |         |         |         |         | 0.44   | 0.34 |
| Yes – no. (%)                          | 13 (17) | 4 (17)  | 1 (7)   | 8 (21)  |        |      |
| No – no. (%)                           | 62 (82) | 19 (83) | 14 (93) | 29 (76) |        |      |
| Missing – no. (%)                      | 1 (1)   | 0 (0)   | 0 (0)   | 1 (3)   |        |      |
| Cause of death                         |         |         |         |         | <0.001 | 0.06 |
| Alive – no. (%)                        | 27 (35) | 16 (70) | 5 (33)  | 6 (16)  |        |      |
| Relapse – no. (%)                      | 28 (37) | 6 (26)  | 4 (27)  | 18 (48) |        |      |
| Progression – no. (%)                  | 2 (3)   | 0 (0)   | 0 (0)   | 2 (5)   |        |      |
| Infection – no. (%)                    | 4 (5)   | 1 (26)  | 3 (20)  | 0 (0)   |        |      |
| Acute GvHD – no. (%)                   | 2 (3)   | 0 (0)   | 0 (0)   | 2 (5)   |        |      |
| Chronic GvHD – no. (%)                 | 4 (5)   | 0 (0)   | 2 (13)  | 2 (5)   |        |      |
| Other/unknown – no. (%)                | 9 (12)  | 0 (0)   | 1 (7)   | 8 (21)  |        |      |
| Treatment between DLI and FU90         |         |         |         |         | <0.001 | 0.02 |
| No additional treatment – no. (%)      | 21 (28) | 13 (57) | 2 (13)  | 6 (16)  |        |      |
| Only DLI – no. (%)                     | 28 (37) | 10 (42) | 10 (67) | 8 (21)  |        |      |
| Non-intensive therapy (+DLI) – no. (%) | 17 (22) | 0 (0)   | 1 (7)   | 16 (42) |        |      |
| Intensive therapy (+DLI) – no. (%)     | 10 (13) | 0 (0)   | 2 (13)  | 8 (21)  |        |      |

Abbreviations: alloHCT, allogeneic hematopoietic cell transplantation; BM, bone marrow; CMV, cytomegalovirus; CR, complete remission; CRi, CR with incomplete haematological recovery; DLI, donor lymphocyte infusion; DRI, disease risk index; FU90, follow up time point 90 days after DLI; GvHD, graft versus host disease; HCT-CI, Hematopoietic Cell Transplantation-specific Comorbidity Index; MRD, matched related donor; MMRD, mismatched related donor; MMUD, mismatched unrelated donor; MUD, matched unrelated donor; PB, peripheral blood; pDLI, preemptive DLI; tDLI, therapeutic DLI; WBC, white blood cell.

**Supplementary Table S4:** Association of mutational classes identified at diagnosis with CR/CRi status 90 days after DLI (FU90).

| Mutational class at diagnosis | All (n=76) | noCR/CRi at FU90 (n=29) | CR/CRi at FU90 (n=47) | p    |
|-------------------------------|------------|-------------------------|-----------------------|------|
| Epigenetic modifier           |            |                         |                       | 0.41 |
| Mutated – no. (%)             | 36 (47)    | 12 (41)                 | 24 (51)               |      |
| Wild type – no. (%)           | 40 (53)    | 17 (59)                 | 23 (49)               |      |
| Nucleophosmin                 |            |                         |                       | 0.11 |
| Mutated – no. (%)             | 8 (11)     | 1 (3)                   | 7 (15)                |      |
| Wild type – no. (%)           | 68 (89)    | 28 (97)                 | 40 (85)               |      |
| Chromatin modifier            |            |                         |                       | 0.07 |
| Mutated – no. (%)             | 5 (7)      | 0 (0)                   | 5 (11)                |      |
| Wild type – no. (%)           | 71 (93)    | 29 (100)                | 42 (89)               |      |
| Cohesin complex               |            |                         |                       | 0.9  |
| Mutated – no. (%)             | 11 (14)    | 4 (14)                  | 7 (15)                |      |
| Wild type – no. (%)           | 65 (86)    | 25 (86)                 | 40 (85)               |      |
| Signal transduction           |            |                         |                       | 0.6  |
| Mutated – no. (%)             | 29 (38)    | 10 (34)                 | 19 (40)               |      |
| Wild type – no. (%)           | 47 (62)    | 19 (66)                 | 28 (60)               |      |
| Spliceosome                   |            |                         |                       | 0.31 |
| Mutated – no. (%)             | 14 (18)    | 7 (24)                  | 7 (15)                |      |
| Wild type – no. (%)           | 62 (82)    | 22 (76)                 | 40 (85)               |      |
| Myeloid Transcription factor  |            |                         |                       | 0.4  |
| Mutated – no. (%)             | 27 (36)    | 12 (41)                 | 15 (32)               |      |
| Wild type – no. (%)           | 49 (74)    | 17 (59)                 | 32 (68)               |      |
| Tumor suppressor              |            |                         |                       | 0.07 |
| Mutated – no. (%)             | 20 (26)    | 11 (38)                 | 9 (19)                |      |
| Wild type – no. (%)           | 56 (72)    | 18 (62)                 | 38 (81)               |      |
| Other                         |            |                         |                       | 0.43 |
| Mutated – no. (%)             | 1 (1)      | 0 (0)                   | 1 (2)                 |      |
| Wild type – no. (%)           | 75 (99)    | 29 (100)                | 46 (98)               |      |



**Supplementary Table S5:** Frequency of genes used for NGS-MRD analysis and limit of detection (LOD) by gene.

| Gene                | Number of MRD-measurements (n) | Percentage of MRD-measurements (%) | Number of patients (n) | Percentage of patients (%) | Median limit of detection (VAF %) |
|---------------------|--------------------------------|------------------------------------|------------------------|----------------------------|-----------------------------------|
| <i>ASXL1</i>        | 4                              | 0.86                               | 2                      | 2.6                        | 0.03545                           |
| <i>ASXL2</i>        | 17                             | 3.66                               | 6                      | 7.9                        | 0.0229                            |
| <i>BCOR</i>         | 18                             | 3.87                               | 8                      | 10.5                       | 0.0389                            |
| <i>BCORL1</i>       | 8                              | 1.72                               | 3                      | 3.9                        | 0.0311                            |
| <i>CALR</i>         | 2                              | 0.43                               | 1                      | 1.3                        | 0.0214                            |
| <i>CBL</i>          | 2                              | 0.43                               | 1                      | 1.3                        | 0.0119                            |
| <i>CEBPA</i>        | 5                              | 1.08                               | 2                      | 2.6                        | 0.0332                            |
| <i>CSF3R</i>        | 6                              | 1.29                               | 1                      | 1.3                        | 0.0128                            |
| <i>CUX1</i>         | 3                              | 0.43                               | 1                      | 1.3                        | 1.205                             |
| <i>DDX41</i>        | 6                              | 1.29                               | 1                      | 1.3                        | 0.01965                           |
| <i>DNMT3A</i>       | 43                             | 9.25                               | 18                     | 23.7                       | 0.019                             |
| <i>ETNK1</i>        | 3                              | 0.65                               | 1                      | 1.3                        | 0.0311                            |
| <i>ETV6</i>         | 6                              | 1.29                               | 3                      | 3.9                        | 0.0198                            |
| <i>EZH2</i>         | 11                             | 2.37                               | 4                      | 5.3                        | 0.0224                            |
| <i>FLT3</i>         | 45                             | 9.68                               | 11                     | 14.5                       | 0.01405                           |
| <i>GATA2</i>        | 4                              | 0.86                               | 2                      | 2.6                        | 0.02745                           |
| <i>IDH1</i>         | 9                              | 1.94                               | 3                      | 3.9                        | 0.02015                           |
| <i>IDH2</i>         | 15                             | 3.23                               | 6                      | 7.9                        | 0.0155                            |
| <i>JAK2</i>         | 2                              | 0.43                               | 1                      | 1.3                        | 0.0458                            |
| <i>KDM6A</i>        | 7                              | 1.51                               | 3                      | 3.9                        | 0.0124                            |
| <i>KIT</i>          | 3                              | 0.65                               | 1                      | 1.3                        | 0.0036                            |
| <i>KMT2A</i>        | 3                              | 0.65                               | 1                      | 1.3                        | 0.0341                            |
| <i>KRAS</i>         | 6                              | 1.29                               | 5                      | 6.6                        | 0.021398                          |
| <i>NF1</i>          | 4                              | 0.86                               | 2                      | 2.6                        | 0.0434                            |
| <i>NPM1</i>         | 20                             | 4.30                               | 8                      | 10.5                       | No LOD*                           |
| <i>NRAS</i>         | 12                             | 2.58                               | 5                      | 6.6                        | 0.0136                            |
| <i>PHF6</i>         | 12                             | 2.58                               | 4                      | 5.3                        | 0.0235                            |
| <i>PTPN11</i>       | 11                             | 2.37                               | 5                      | 6.6                        | 0.0198                            |
| <i>RUNX1</i>        | 29                             | 6.24                               | 11                     | 14.5                       | 0.0233                            |
| <i>SF3B1</i>        | 19                             | 4.09                               | 8                      | 10.5                       | 0.0204                            |
| <i>SMC1A</i>        | 1                              | 0.22                               | 1                      | 1.3                        | 0.03064                           |
| <i>SMC3</i>         | 5                              | 1.08                               | 1                      | 1.3                        | 0.026074088                       |
| <i>SRSF2,MFSD11</i> | 8                              | 1.72                               | 3                      | 3.9                        | 0.02545                           |
| <i>STAG2</i>        | 17                             | 3.66                               | 7                      | 9.2                        | 0.01365                           |
| <i>TET2</i>         | 35                             | 7.53                               | 11                     | 14.5                       | 0.0206                            |
| <i>TP53</i>         | 31                             | 6.67                               | 12                     | 15.8                       | 0.02605                           |

|               |            |            |            |                                           |                               |
|---------------|------------|------------|------------|-------------------------------------------|-------------------------------|
| <i>U2AF1</i>  | 8          | 1.72       | 3          | 3.9                                       | 0.0073                        |
| <i>WT1</i>    | 24         | 5.16       | 10         | 13.2                                      | 0.0256                        |
| <i>ZBTB7A</i> | 1          | 0.22       | 1          | 1.3                                       | 0.0238                        |
| <i>ZRSR2</i>  | 1          | 0.22       | 1          | 1.3                                       | 0.036                         |
| <b>Total</b>  | <b>466</b> | <b>100</b> | <b>178</b> | <b>Median 2<br/>genes per<br/>patient</b> | <b>Median<br/>LOD: 0.0221</b> |

\*Limit of detection is defined as 10 supporting reads.

**Supplementary Table S6:** Mutational groups at diagnosis of patients who were in CR/CRi and MRD<sup>-</sup> at DLI, patients who were in CR/CRi and MRD<sup>+</sup> at DLI and patients who were not in CR/CRi at DLI.

| <b>Mutational class at diagnosis</b> | <b>All (n=76)</b> | <b>CR/CRi MRD<sup>-</sup> (n=23)</b> | <b>CR/CRi MRD<sup>+</sup> (n=15)</b> | <b>no CR/CRi at DLI (n=38)</b> | <b>p (all)</b> | <b>p (MRD<sup>-</sup> vs. MRD<sup>+</sup>)</b> |
|--------------------------------------|-------------------|--------------------------------------|--------------------------------------|--------------------------------|----------------|------------------------------------------------|
| Epigenetic modifier                  |                   |                                      |                                      |                                | 0.85           | 0.74                                           |
| Mutated – no. (%)                    | 36 (47)           | 11 (48)                              | 8 (53)                               | 17 (45)                        |                |                                                |
| Wild type – no. (%)                  | 40 (53)           | 12 (52)                              | 7 (47)                               | 21 (55)                        |                |                                                |
| Nucleophosmin                        |                   |                                      |                                      |                                | 0.33           | 0.15                                           |
| Mutated – no. (%)                    | 8 (11)            | 3 (13)                               | 0 (0)                                | 5 (13)                         |                |                                                |
| Wild type – no. (%)                  | 68 (89)           | 20 (87)                              | 15 (100)                             | 33 (87)                        |                |                                                |
| Chromatin modifier                   |                   |                                      |                                      |                                | 0.28           | 0.53                                           |
| Mutated – no. (%)                    | 5 (7)             | 3 (13)                               | 1 (7)                                | 1 (3)                          |                |                                                |
| Wild type – no. (%)                  | 71 (93)           | 20 (87)                              | 14 (93)                              | 37 (97)                        |                |                                                |
| Cohesin complex                      |                   |                                      |                                      |                                | 0.57           | 0.65                                           |
| Mutated – no. (%)                    | 11 (14)           | 2 (9)                                | 2 (13)                               | 7 (18)                         |                |                                                |
| Wild type – no. (%)                  | 65 (86)           | 21 (91)                              | 12 (87)                              | 31 (82)                        |                |                                                |
| Signal transduction                  |                   |                                      |                                      |                                | 0.4            | 0.26                                           |
| Mutated – no. (%)                    | 29 (38)           | 8 (35)                               | 8 (53)                               | 13 (34)                        |                |                                                |
| Wild type – no. (%)                  | 47 (62)           | 15 (65)                              | 7 (47)                               | 25 (66)                        |                |                                                |
| Spliceosome                          |                   |                                      |                                      |                                | 0.35           | 0.34                                           |
| Mutated – no. (%)                    | 14 (18)           | 4 (17)                               | 1 (7)                                | 9 (23)                         |                |                                                |
| Wild type – no. (%)                  | 62 (82)           | 19 (83)                              | 14 (93)                              | 29 (76)                        |                |                                                |
| Myeloid Transcription factor         |                   |                                      |                                      |                                | 0.37           | 0.22                                           |
| Mutated – no. (%)                    | 27 (36)           | 9 (39)                               | 3 (20)                               | 15 (39)                        |                |                                                |

|                     |         |         |         |         |      |      |
|---------------------|---------|---------|---------|---------|------|------|
| Wild type – no. (%) | 49 (65) | 14 (61) | 12 (80) | 23 (61) |      |      |
| Tumor suppressor    |         |         |         |         | 0.25 | 0.54 |
| Mutated – no. (%)   | 20 (26) | 5 (22)  | 2 (13)  | 13 (34) |      |      |
| Wild type – no. (%) | 56 (74) | 18 (78) | 12 (87) | 25 (66) |      |      |

**Supplementary Table S7:** Univariate analysis of all considered variables for EFS and OS for all patients (n=76). See excel file “Supplementary Table S7”.

**Supplementary Table S8:** Baseline characteristics of patients in CR/CRi at FU30.

| Characteristic                            | All (n=34) | MRD <sup>-</sup> FU30 (n=25) | MRD <sup>+</sup> FU30 (n=9) | p     |
|-------------------------------------------|------------|------------------------------|-----------------------------|-------|
| Age at diagnosis                          |            |                              |                             | 0.56  |
| Median (years)                            | 51.3       | 50.1                         | 56.9                        |       |
| Range (years)                             | 21-66.9    | 21-66.9                      | 38.9-64.8                   |       |
| Patient sex                               |            |                              |                             | 0.86  |
| Male – no. (%)                            | 18 (53)    | 13 (52)                      | 5 (56)                      |       |
| Female – no. (%)                          | 16 (47)    | 12 (48)                      | 4 (44)                      |       |
| Diagnosis                                 |            |                              |                             | 0.041 |
| De novo AML – no. (%)                     | 21 (62)    | 18 (72)                      | 3 (33)                      |       |
| sAML / tAML / MDS/AML – no. (%)           | 13 (38)    | 7 (28)                       | 6 (67)                      |       |
| Extramedullary manifestation at diagnosis |            |                              |                             | 0.26  |
| Yes – no. (%)                             | 4 (12)     | 2 (8)                        | 2 (22)                      |       |
| No – no. (%)                              | 30 (88)    | 23 (92)                      | 7 (78)                      |       |
| FAB-subtype                               |            |                              |                             | 0.26  |
| M0 + M1 + M2 – no. (%)                    | 18 (53)    | 15 (60)                      | 3 (33)                      |       |
| M4 + M5 + M6 + M7 – no. (%)               | 5 (15)     | 3 (12)                       | 2 (22)                      |       |
| Not classifiable – no. (%)                | 11 (32)    | 7 (28)                       | 5 (45)                      |       |
| FLT3-ITD status at diagnosis              |            |                              |                             | 0.41  |
| Yes – no. (%)                             | 7 (21)     | 6 (24)                       | 1 (11)                      |       |
| No – no. (%)                              | 27 (79)    | 19 (76)                      | 8 (89)                      |       |
| FLT3-TKD status at diagnosis              |            |                              |                             | 0.79  |
| Yes – no. (%)                             | 3 (9)      | 2 (8)                        | 1 (11)                      |       |
| No – no. (%)                              | 31 (91)    | 23 (92)                      | 8 (89)                      |       |
| Complex karyotype                         |            |                              |                             | 0.15  |
| Yes – no. (%)                             | 5 (15)     | 5 (20)                       | 0 (0)                       |       |

|                                      |           |           |         |       |
|--------------------------------------|-----------|-----------|---------|-------|
| No – no. (%)                         | 29 (85)   | 20 (80)   | 9 (100) |       |
| Monosomal karyotype                  |           |           |         | 0.15  |
| Yes – no. (%)                        | 5 (15)    | 5 (20)    | 0 (0)   |       |
| No – no. (%)                         | 29 (85)   | 20 (80)   | 9 (100) |       |
| 2022 ELN risk group                  |           |           |         | 0.5   |
| Favorable + Intermediate – no. (%)   | 12 (35)   | 8 (32)    | 4 (44)  |       |
| Adverse – no. (%)                    | 22 (65)   | 17 (68)   | 5 (56)  |       |
| MRC Grimwade                         |           |           |         | 0.22  |
| Favorable + Intermediate – no. (%)   | 25 (74)   | 17 (68)   | 8 (89)  |       |
| Adverse – no. (%)                    | 9 (26)    | 8 (32)    | 1 (11)  |       |
| ECOG performance status at diagnosis |           |           |         | 0.44  |
| ECOG 0 – no. (%)                     | 32 (94)   | 24 (96)   | 8 (89)  |       |
| ECOG 1 – no. (%)                     | 2 (6)     | 1 (4)     | 1 (11)  |       |
| HCT–CI at diagnosis                  |           |           |         | 0.019 |
| 0-2 – no. (%)                        | 30 (88)   | 24 (96)   | 6 (67)  |       |
| >2 – no. (%)                         | 4 (12)    | 1 (4)     | 3 (33)  |       |
| WBC count at diagnosis               |           |           |         | 0.014 |
| Median – (x 10 <sup>9</sup> /l)      | 7.8       | 23.9      | 1.9     |       |
| Range – (x 10 <sup>9</sup> /l)       | 1.2-115.2 | 1.2-115.2 | 1.4-2.9 |       |
| Missing – no. (%)                    | 9 (26)    | 6 (24)    | 3 (33)  |       |
| Hemoglobin at diagnosis              |           |           |         | 0.57  |
| Median – g/dL                        | 9.7       | 9.8       | 9.3     |       |
| Range – g/dL                         | 6.7-14.4  | 6.7-14.4  | 8-10.8  |       |
| Missing – no. (%)                    | 9 (26)    | 6 (24)    | 3 (33)  |       |
| Platelet count at diagnosis          |           |           |         | 0.45  |
| Median – (x 10 <sup>9</sup> /l)      | 46        | 55        | 32      |       |
| Range – (x 10 <sup>9</sup> /l)       | 7-1104    | 7-1104    | 20-201  |       |
| Missing – no. (%)                    | 9 (26)    | 6 (24)    | 3 (33)  |       |
| Blasts PB at diagnosis               |           |           |         | 0.34  |
| Median – %                           | 39.8      | 67.5      | 1.5     |       |
| Range – %                            | 0-93      | 0-93      | 0-70    |       |
| Missing – no. (%)                    | 10 (29)   | 7 (28)    | 3 (33)  |       |
| Blasts BM at diagnosis               |           |           |         | 0.3   |
| Median – %                           | 48.4      | 80        | 40      |       |
| Range – %                            | 20-95     | 20-95     | 25-47   |       |
| Missing – no. (%)                    | 20 (59)   | 14 (56)   | 6 (67)  |       |

Abbreviations: BM, bone marrow; CMV, cytomegalovirus; CR, complete remission; CRi, CR with incomplete haematological recovery; ECOG, Eastern Cooperative Oncology Group; ELN, European leukemia net; FAB, French-American-British; HCT-CI, Hematopoietic Cell Transplantation-specific Comorbidity Index; ITD, internal tandem duplication; MDS, Myelodysplas-

tic syndrome; MRC, Medical research council; PB, peripheral blood; sAML, secondary AML; tAML, therapy-related AML; WBC, white blood cell.

**Supplementary Table S9:** Treatment- and transplantation-associated characteristics of patients in CR/CRi at FU30.

| Characteristic                                | All (n=34) | MRD <sup>-</sup> FU30 (n=25) | MRD <sup>+</sup> FU30 (n=9) | p     |
|-----------------------------------------------|------------|------------------------------|-----------------------------|-------|
| Number of chemotherapy cycles before alloHCT1 |            |                              |                             | 0.21  |
| 0-1 cycles – no. (%)                          | 9 (26)     | 4 (16)                       | 5 (56)                      |       |
| ≥2 – no. (%)                                  | 25 (74)    | 21 (84)                      | 4 (44)                      |       |
| DRI score grouped                             |            |                              |                             | 0.31  |
| Low + intermediate – no. (%)                  | 20 (59)    | 16 (64)                      | 4 (44)                      |       |
| High + very high – no. (%)                    | 14 (41)    | 9 (36)                       | 5 (56)                      |       |
| Remission status at alloHCT1                  |            |                              |                             | 0.3   |
| First CR – no. (%)                            | 12 (35)    | 11 (44)                      | 1 (11)                      |       |
| CRi – no. (%)                                 | 2 (6)      | 2 (8)                        | 0 (0)                       |       |
| Partial remission – no. (%)                   | 2 (6)      | 1 (4)                        | 1 (11)                      |       |
| Second CR – no. (%)                           | 6 (18)     | 4 (16)                       | 2 (22)                      |       |
| No CR/CRi/PR – no. (%)                        | 12 (35)    | 7 (28)                       | 5 (56)                      |       |
| Donor match at alloHCT1                       |            |                              |                             | 0.85  |
| MRD – no. (%)                                 | 13 (38)    | 9 (36)                       | 4 (45)                      |       |
| MUD – no. (%)                                 | 14 (41)    | 11 (44)                      | 3 (33)                      |       |
| MMRD or MMUD – no. (%)                        | 7 (21)     | 5 (20)                       | 2 (22)                      |       |
| Conditioning therapy alloHCT1                 |            |                              |                             | 0.22  |
| Myeloablative – no. (%)                       | 9 (26)     | 8 (32)                       | 1 (11)                      |       |
| Reduced intensity – no. (%)                   | 25 (74)    | 17 (68)                      | 8 (89)                      |       |
| Stem cell source at alloHCT1                  |            |                              |                             | 0.039 |
| PB – no. (%)                                  | 27 (79)    | 22 (88)                      | 5 (56)                      |       |
| BM – no. (%)                                  | 7 (21)     | 3 (12)                       | 4 (44)                      |       |
| Donor sex alloHCT1                            |            |                              |                             | 0.25  |
| Male – no. (%)                                | 21 (62)    | 14 (56)                      | 7 (78)                      |       |
| Female – no. (%)                              | 13 (38)    | 11 (44)                      | 2 (22)                      |       |
| Donor age alloHCT1                            |            |                              |                             | 0.98  |
| Median (years)                                | 41.8       | 42.4                         | 37                          |       |
| Range (years)                                 | 21.1-64.4  | 22.9-58.7                    | 21.1-64.4                   |       |
| Missing – no. (%)                             | 1 (3)      | 1 (4)                        | 0 (0)                       |       |
| Patient age alloHCT1                          |            |                              |                             | 0.64  |

|                                        |          |          |          |      |
|----------------------------------------|----------|----------|----------|------|
| Median (years)                         | 51.7     | 51       | 58       |      |
| Range (years)                          | 21.5-67  | 21.5-67  | 39-65    |      |
| CMV status alloHCT1                    |          |          |          | 0.5  |
| Patient neg. /Donor neg. – no. (%)     | 12 (35)  | 8 (32)   | 4 (44)   |      |
| Any other constellation – no. (%)      | 22 (65)  | 17 (68)  | 5 (56)   |      |
| Acute GvHD after alloHCT1 before DLI   |          |          |          | 0.59 |
| Yes – no. (%)                          | 9 (26)   | 6 (24)   | 3 (33)   |      |
| No – no. (%)                           | 25 (74)  | 19 (76)  | 6 (67)   |      |
| Acute GvHD after alloHCT1 grade        |          |          |          | -    |
| Grade I or II – no. (%)                | 9 (100)  | 6 (100)  | 3 (100)  |      |
| Grade III or IV – no. (%)              | 0 (0)    | 0 (0)    | 0 (0)    |      |
| Chronic GvHD after alloHCT1 before DLI |          |          |          | 0.27 |
| Yes – no. (%)                          | 7 (21)   | 4 (16)   | 3 (33)   |      |
| No – no. (%)                           | 27 (79)  | 21 (84)  | 6 (67)   |      |
| Chronic GvHD after alloHCT1 max. grade |          |          |          | -    |
| Limited – no. (%)                      | 7 (100)  | 4 (100)  | 3 (100)  |      |
| Extensive – no. (%)                    | 0 (0)    | 0 (0)    | 0 (0)    |      |
| Type first DLI                         |          |          |          | 0.89 |
| pDLI – no. (%)                         | 22 (65)  | 16 (64)  | 6 (67)   |      |
| tDLI – no. (%)                         | 12 (35)  | 9 (36)   | 3 (33)   |      |
| Remission status before DLI1           |          |          |          | 0.68 |
| CR/CRi – no. (%)                       | 28 (82)  | 21 (84)  | 7 (78)   |      |
| No CR/CRi – no. (%)                    | 6 (18)   | 4 (16)   | 2 (22)   |      |
| WBC count at DLI                       |          |          |          | 0.47 |
| Median – (x 10 <sup>9</sup> /l)        | 5        | 5.2      | 4.5      |      |
| Range – (x 10 <sup>9</sup> /l)         | 0.3-11.9 | 0.3-11.9 | 0.8-8.2  |      |
| Hemoglobin at DLI                      |          |          |          | 0.4  |
| Median – g/dL                          | 11.2     | 10.7     | 12.6     |      |
| Range – g/dL                           | 7.1-15.3 | 7.1-15.3 | 9-14.9   |      |
| Platelet count at DLI                  |          |          |          | 0.99 |
| Median – (x 10 <sup>9</sup> /l)        | 125.5    | 121      | 143      |      |
| Range – (x 10 <sup>9</sup> /l)         | 12-274   | 13-231   | 12-274   |      |
| Blasts PB at DLI                       |          |          |          | 1    |
| Median – %                             | 0        | 0        | 0        |      |
| Range – %                              | 0-4.3    | 0-4.3    | 0-1      |      |
| Blasts BM at DLI                       |          |          |          | 0.82 |
| Median – %                             | 4        | 4        | 25       |      |
| Range – %                              | 0-50     | 0-7      | 0-50     |      |
| Missing – no. (%)                      | 24 (71)  | 17 (63)  | 7 (78)   |      |
| Time between alloHCT and DLI           |          |          |          | 0.53 |
| Median (month)                         | 7.7      | 7.7      | 9.1      |      |
| Range – %                              | 3.1-74.7 | 3.1-74.7 | 4.3-22.8 |      |
| Donor chimerism BM at DLI              |          |          |          | 0.18 |

|                                    |           |           |          |      |
|------------------------------------|-----------|-----------|----------|------|
| Median – %                         | 98.3      | 100       | 90       |      |
| Range – %                          | 37-100    | 37-100    | 47-97    |      |
| Missing – no. (%)                  | 26 (76)   | 20 (80)   | 6 (67)   |      |
| Donor chimerism PB at DLI          |           |           |          | 0.86 |
| Median – %                         | 100       | 100       | 100      |      |
| Range – %                          | 91-100    | 95-100    | 91-100   |      |
| Missing – no. (%)                  | 1 (3)     | 1 (4)     | 0 (0)    |      |
| Number of DLIs until FU90          |           |           |          | 0.25 |
| 1 – no. (%)                        | 15 (44)   | 13 (52)   | 2 (22)   |      |
| 2 – no. (%)                        | 15 (44)   | 9 (36)    | 6 (67)   |      |
| 3 – no. (%)                        | 4 (12)    | 3 (12)    | 1 (11)   |      |
| DLI starting dose                  |           |           |          | 0.95 |
| Median (*10 <sup>5</sup> CD3+/kg)  | 10        | 50        | 10       |      |
| Range (*10 <sup>5</sup> CD3+/kg)   | 0.3-210   | 5-210     | 0.3-100  |      |
| DLI total dose until FU90          |           |           |          | 0.98 |
| Median (*10 <sup>5</sup> CD3+/kg)  | 60        | 75        | 60       |      |
| Range (*10 <sup>5</sup> CD3+/kg)   | 0.3-1530  | 5-1530    | 0.3-1380 |      |
| Age at DLI                         |           |           |          | 0.7  |
| Median (years)                     | 52.3      | 51.7      | 58.8     |      |
| Range (years)                      | 22.9-68.9 | 22.9-68.9 | 40-66.3  |      |
| Donor chimerism PB after DLI       |           |           |          | 0.79 |
| Median – %                         | 100       | 100       | 100      |      |
| Range – %                          | 86-100    | 97-100    | 86-100   |      |
| Missing – no. (%)                  | 7 (21)    | 5 (20)    | 2 (22)   |      |
| Acute GvHD after DLI1              |           |           |          | 0.05 |
| Yes – no. (%)                      | 8 (24)    | 8 (32)    | 0 (0)    |      |
| No – no. (%)                       | 26 (76)   | 17 (68)   | 9 (100)  |      |
| Acute GvHD after DLI1 max grade    |           |           |          | -    |
| Grade I or II – no. (%)            | 5 (63)    | 5 (63)    | 0 (0)    |      |
| Grade III or IV – no. (%)          | 3 (37)    | 3 (37)    | 0 (0)    |      |
| Chronic GvHD after DLI1            |           |           |          | 0.15 |
| Yes – no. (%)                      | 5 (15)    | 5 (20)    | 0 (0)    |      |
| No – no. (%)                       | 29 (85)   | 20 (80)   | 9 (100)  |      |
| Chronic GvHD after DLI1 max. grade |           |           |          | -    |
| Limited – no. (%)                  | 4 (80)    | 4 (80)    | 0 (0)    |      |
| Extensive – no. (%)                | 1 (10)    | 1 (10)    | 0 (0)    |      |
| AlloHCT2 after DLI1                |           |           |          | 0.1  |
| Yes – no. (%)                      | 3 (9)     | 1 (4)     | 2 (22)   |      |
| No – no. (%)                       | 31 (91)   | 24 (96)   | 7 (78)   |      |
| CMV reactivation after DLI         |           |           |          | 0.72 |
| Yes – no. (%)                      | 5 (15)    | 4 (16)    | 1 (11)   |      |
| No – no. (%)                       | 29 (85)   | 21 (84)   | 8 (89)   |      |
| Cause of death                     |           |           |          | 0.05 |
| Alive – no. (%)                    | 18 (53)   | 14 (56)   | 4 (45)   |      |

|                                        |         |         |        |      |
|----------------------------------------|---------|---------|--------|------|
| Relapse – no. (%)                      | 8 (23)  | 6 (24)  | 2 (22) |      |
| Infection – no. (%)                    | 3 (9)   | 1 (4)   | 2 (22) |      |
| Chronic GvHD – no. (%)                 | 2 (6)   | 2 (8)   | 0 (0)  |      |
| Other/unknown – no. (%)                | 3 (9)   | 2 (8)   | 1 (11) |      |
| Treatment between DLI and FU90         |         |         |        | 0.12 |
| No additional treatment – no. (%)      | 13 (38) | 12 (48) | 1 (11) |      |
| Only DLI – no. (%)                     | 17 (50) | 11 (44) | 6 (67) |      |
| Non-intensive therapy (+DLI) – no. (%) | 1 (3)   | 1 (4)   | 0 (0)  |      |
| Intensive therapy (+DLI) – no. (%)     | 3 (9)   | 1 (4)   | 2 (22) |      |
| Treatment after FU90                   |         |         |        | 0.16 |
| No – no. (%)                           | 21 (62) | 18 (72) | 3 (33) |      |
| DLIs only – no. (%)                    | 3 (9)   | 2 (8)   | 1 (11) |      |
| Non-intensive treatment – no. (%)      | 3 (9)   | 2 (8)   | 1 (11) |      |
| Intensive treatment – no. (%)          | 7 (20)  | 3 (12)  | 4 (45) |      |

Abbreviations: alloHCT, allogeneic hematopoietic cell transplantation; BM, bone marrow; CMV, cytomegalovirus; CR, complete remission; CRi, CR with incomplete haematological recovery; DLI, donor lymphocyte infusion; DRI, disease risk index; FU90, follow up time point 90 days after DLI; GvHD, graft versus host disease; HCT-CI, Hematopoietic Cell Transplantation-specific Comorbidity Index; MRD, matched related donor; MMRD, mismatched related donor; MMUD, mismatched unrelated donor; MUD, matched unrelated donor; PB, peripheral blood; pDLI, preemptive DLI; tDLI, therapeutic DLI; WBC, white blood cell.

**Supplementary Table S10:** Molecular characteristics at diagnosis of patients CR/CRi at FU30.

| Mutational class at diagnosis | All (n=34) | MRD <sup>-</sup> FU30 (n=25) | MRD <sup>+</sup> FU30 (n=9) | p    |
|-------------------------------|------------|------------------------------|-----------------------------|------|
| Epigenetic modifier           |            |                              |                             | 0.18 |
| Mutated – no. (%)             | 20 (59)    | 13 (52)                      | 7 (78)                      |      |
| Wild type – no. (%)           | 14 (41)    | 12 (48)                      | 2 (22)                      |      |
| Nucleophosmin                 |            |                              |                             | 0.54 |
| Mutated – no. (%)             | 1 (3)      | 1 (4)                        | 0 (0)                       |      |
| Wild type – no. (%)           | 33 (97)    | 24 (96)                      | 9 (100)                     |      |



|                              |         |         |        |      |
|------------------------------|---------|---------|--------|------|
| Chromatin modifier           |         |         |        | 0.46 |
| Mutated – no. (%)            | 5 (15)  | 3 (12)  | 2 (22) |      |
| Wild type – no. (%)          | 29 (85) | 22 (88) | 7 (78) |      |
| Cohesin complex              |         |         |        | 0.15 |
| Mutated – no. (%)            | 6 (18)  | 3 (12)  | 3 (33) |      |
| Wild type – no. (%)          | 28 (82) | 22 (88) | 6 (67) |      |
| Signal transduction          |         |         |        | 0.94 |
| Mutated – no. (%)            | 11 (32) | 8 (32)  | 3 (33) |      |
| Wild type – no. (%)          | 23 (68) | 17 (68) | 6 (67) |      |
| Spliceosome                  |         |         |        | 0.55 |
| Mutated – no. (%)            | 6 (18)  | 5 (20)  | 1 (11) |      |
| Wild type – no. (%)          | 28 (82) | 20 (80) | 8 (89) |      |
| Myeloid Transcription factor |         |         |        | 0.22 |
| Mutated – no. (%)            | 9 (26)  | 8 (32)  | 1 (11) |      |
| Wild type – no. (%)          | 25 (74) | 17 (68) | 8 (89) |      |
| Tumor suppressor             |         |         |        | 0.72 |
| Mutated – no. (%)            | 5 (15)  | 4 (16)  | 1 (11) |      |
| Wild type – no. (%)          | 29 (85) | 21 (84) | 8 (89) |      |

**Supplementary Table S11:** Univariate analysis of all considered variables for CIR, NRM, RFS and OS for patients in CR/CRi at FU30 (n=34). See excel file “Supplementary Table S11”.

**Supplementary Table S12:** Baseline characteristics at diagnosis of patients CR/CRi at FU90.

| Characteristic                  | All (n=37) | MRD <sup>-</sup> FU90 (n=31) | MRD <sup>+</sup> FU90 (n=6) | p    |
|---------------------------------|------------|------------------------------|-----------------------------|------|
| Age at diagnosis                |            |                              |                             | 0.71 |
| Median (years)                  | 51.7       | 51                           | 54.7                        |      |
| Range (years)                   | 18.3-67.5  | 18.3-66.9                    | 38.9-67.5                   |      |
| Patient sex                     |            |                              |                             | 0.94 |
| Male – no. (%)                  | 18 (49)    | 15 (48)                      | 3 (50)                      |      |
| Female – no. (%)                | 19 (51)    | 16 (52)                      | 3 (50)                      |      |
| Diagnosis                       |            |                              |                             | 0.11 |
| De novo AML – no. (%)           | 23 (62)    | 21 (68)                      | 2 (33)                      |      |
| sAML / tAML / MDS/AML – no. (%) | 14 (38)    | 10 (32)                      | 4 (67)                      |      |

|                                           |           |           |         |      |
|-------------------------------------------|-----------|-----------|---------|------|
| Extramedullary manifestation at diagnosis |           |           |         | 0.29 |
| Yes – no. (%)                             | 5 (14)    | 5 (16)    | 0 (0)   |      |
| No – no. (%)                              | 32 (86)   | 26 (84)   | 6 (100) |      |
| FAB-subtype                               |           |           |         | 0.22 |
| M0 + M1 + M2 – no. (%)                    | 16 (43)   | 13 (23)   | 3 (50)  |      |
| M4 + M5 + M6 + M7 – no. (%)               | 7 (19)    | 7 (42)    | 0 (0)   |      |
| Not classifiable – no. (%)                | 14 (38)   | 11 (35)   | 3 (50)  |      |
| FLT3-ITD status at diagnosis              |           |           |         | 0.45 |
| Yes – no. (%)                             | 8 (22)    | 6 (19)    | 2 (33)  |      |
| No – no. (%)                              | 29 (78)   | 25 (81)   | 4 (67)  |      |
| FLT3-TKD status at diagnosis              |           |           |         | 0.57 |
| Yes – no. (%)                             | 4 (11)    | 4 (13)    | 0 (0)   |      |
| No – no. (%)                              | 33 (89)   | 27 (87)   | 6 (100) |      |
| Complex karyotype                         |           |           |         | 0.29 |
| Yes – no. (%)                             | 5 (14)    | 5 (16)    | 0 (0)   |      |
| No – no. (%)                              | 32 (86)   | 26 (84)   | 6 (100) |      |
| Monosomal karyotype                       |           |           |         | 0.97 |
| Yes – no. (%)                             | 6 (16)    | 5 (16)    | 1 (17)  |      |
| No – no. (%)                              | 31 (84)   | 26 (84)   | 5 (33)  |      |
| 2022 ELN risk group                       |           |           |         | 0.83 |
| Favorable + Intermediate – no. (%)        | 17 (46)   | 14 (45)   | 3 (50)  |      |
| Adverse – no. (%)                         | 29 (54)   | 17 (55)   | 3 (50)  |      |
| MRC Grimwade                              |           |           |         | 0.53 |
| Favorable + Intermediate – no. (%)        | 27 (73)   | 22 (71)   | 5 (83)  |      |
| Adverse – no. (%)                         | 10 (27)   | 9 (29)    | 1 (17)  |      |
| ECOG performance status at diagnosis      |           |           |         | 0.52 |
| ECOG 0 – no. (%)                          | 35 (95)   | 29 (94)   | 6 (100) |      |
| ECOG 1 – no. (%)                          | 2 (5)     | 2 (6)     | 0 (0)   |      |
| HCT-CI at diagnosis                       |           |           |         | 0.81 |
| 0-2 – no. (%)                             | 32 (86)   | 27 (87)   | 5 (83)  |      |
| >2 – no. (%)                              | 5 (14)    | 4 (13)    | 1 (17)  |      |
| WBC count at diagnosis                    |           |           |         | 0.18 |
| Median – (x 10 <sup>9</sup> /l)           | 3.6       | 7.9       | 2.2     |      |
| Range – (x 10 <sup>9</sup> /l)            | 1.4-115.2 | 1.4-115.2 | 1.7-5.5 |      |
| Missing – no. (%)                         | 10 (27)   | 9 (29)    | 1 (17)  |      |
| Hemoglobin at diagnosis                   |           |           |         | 0.3  |
| Median – g/dL                             | 9.7       | 9.5       | 10.8    |      |
| Range – g/dL                              | 5-14.4    | 5-14.4    | 8-11.8  |      |
| Missing – no. (%)                         | 10 (27)   | 9 (29)    | 1 (17)  |      |
| Platelet count at diagnosis               |           |           |         | 0.21 |
| Median – (x 10 <sup>9</sup> /l)           | 60        | 61.5      | 37      |      |
| Range – (x 10 <sup>9</sup> /l)            | 7-1104    | 7-1104    | 20-469  |      |
| Missing – no. (%)                         | 10 (27)   | 9 (28)    | 1 (17)  |      |

|                        |         |         |        |      |
|------------------------|---------|---------|--------|------|
| Blasts PB at diagnosis |         |         |        | 0.45 |
| Median – %             | 18.2    | 19.6    | 0      |      |
| Range – %              | 0-93    | 0-93    | 0-60   |      |
| Missing – no. (%)      | 11 (30) | 10 (32) | 1 (17) |      |
| Blasts BM at diagnosis |         |         |        | 0.72 |
| Median – %             | 37.5    | 43.4    | 25     |      |
| Range – %              | 20-95   | 20-95   | 20-90  |      |
| Missing – no. (%)      | 19 (51) | 17 (55) | 2 (33) |      |

Abbreviations: BM, bone marrow; CMV, cytomegalovirus; CR, complete remission; CRi, CR with incomplete haematological recovery; ECOG, Eastern Cooperative Oncology Group; ELN, European leukemia net; FAB, French-American-British; HCT-CI, Hematopoietic Cell Transplantation-specific Comorbidity Index; ITD, internal tandem duplication; MDS, Myelodysplastic syndrome; MRC, Medical research council; PB, peripheral blood; sAML, secondary AML; tAML, therapy-related AML; WBC, white blood cell.

**Supplementary Table S13:** Treatment- and transplant-associated characteristics of patients in CR/CRi at FU90.

| Characteristic                                | All (n=37) | MRD <sup>-</sup> FU90 (n=31) | MRD <sup>+</sup> FU90 (n=6) | p    |
|-----------------------------------------------|------------|------------------------------|-----------------------------|------|
| Number of chemotherapy cycles before alloHCT1 |            |                              |                             | 0.57 |
| 0-1 cycles – no. (%)                          | 9 (24)     | 7 (23)                       | 2 (33)                      |      |
| ≥2 – no. (%)                                  | 28 (76)    | 24 (77)                      | 4 (67)                      |      |
| DRI score grouped                             |            |                              |                             | 0.8  |
| Low + intermediate – no. (%)                  | 23 (62)    | 19 (61)                      | 4 (67)                      |      |
| High + very high – no. (%)                    | 14 (38)    | 12 (39)                      | 2 (33)                      |      |
| Remission status at alloHCT1                  |            |                              |                             | 0.92 |
| First CR – no. (%)                            | 15 (41)    | 13 (42)                      | 2 (33)                      |      |
| CRi – no. (%)                                 | 1 (3)      | 1 (3)                        | 0 (0)                       |      |
| Partial remission – no. (%)                   | 3 (8)      | 2 (7)                        | 1 (17)                      |      |
| Second CR – no. (%)                           | 6 (16)     | 5 (16)                       | 1 (17)                      |      |
| No CR/CRi/PR – no. (%)                        | 12 (32)    | 10 (32)                      | 2 (33)                      |      |
| Donor match at alloHCT1                       |            |                              |                             | 0.54 |

|                                        |           |           |           |       |
|----------------------------------------|-----------|-----------|-----------|-------|
| MRD – no. (%)                          | 13 (35)   | 12 (39)   | 1 (17)    |       |
| MUD – no. (%)                          | 16 (43)   | 13 (42)   | 3 (50)    |       |
| MMRD or MMUD – no. (%)                 | 8 (22)    | 6 (19)    | 2 (33)    |       |
| Conditioning therapy alloHCT1          |           |           |           | 0.1   |
| Myeloablative – no. (%)                | 10 (27)   | 10 (32)   | 0 (0)     |       |
| Reduced intensity – no. (%)            | 27 (73)   | 21 (68)   | 6 (100)   |       |
| Stem cell source at alloHCT1           |           |           |           | 0.45  |
| PB – no. (%)                           | 29 (78)   | 25 (81)   | 4 (67)    |       |
| BM – no. (%)                           | 8 (22)    | 6 (19)    | 2 (33)    |       |
| Donor sex alloHCT1                     |           |           |           | 0.59  |
| Male – no. (%)                         | 21 (57)   | 17 (55)   | 4 (67)    |       |
| Female – no. (%)                       | 16 (43)   | 14 (45)   | 2 (33)    |       |
| Donor age alloHCT1                     |           |           |           | 0.015 |
| Median (years)                         | 38.6      | 42.5      | 26.7      |       |
| Range (years)                          | 20.3-64.4 | 20.3-64.4 | 21.1-35.1 |       |
| Missing – no. (%)                      | 1 (3)     | 1 (3)     | 0 (0)     |       |
| Patient age alloHCT1                   |           |           |           | 0.71  |
| Median (years)                         | 52.1      | 51.3      | 55.6      |       |
| Range (years)                          | 18.5-68   | 18.5-67   | 39-68     |       |
| CMV status alloHCT1                    |           |           |           | 0.92  |
| Patient neg. /Donor neg. – no. (%)     | 13 (35)   | 11 (35)   | 2 (33)    |       |
| Any other constellation – no. (%)      | 24 (65)   | 20 (65)   | 4 (67)    |       |
| Acute GvHD after alloHCT1 before DLI   |           |           |           | 0.7   |
| Yes – no. (%)                          | 10 (27)   | 8 (26)    | 2 (33)    |       |
| No – no. (%)                           | 27 (73)   | 23 (74)   | 4 (67)    |       |
| Acute GvHD after alloHCT1 grade        |           |           |           | -     |
| Grade I or II – no. (%)                | 10 (100)  | 8 (100)   | 2 (100)   |       |
| Grade III or IV – no. (%)              | 0 (0)     | 0 (0)     | 0 (0)     |       |
| Chronic GvHD after alloHCT1 before DLI |           |           |           | 0.75  |
| Yes – no. (%)                          | 8 (22)    | 7 (23)    | 1 (17)    |       |
| No – no. (%)                           | 29 (78)   | 24 (77)   | 5 (83)    |       |
| Chronic GvHD after alloHCT1 max. grade |           |           |           | -     |
| Limited – no. (%)                      | 8 (100)   | 7 (100)   | 1 (100)   |       |
| Extensive – no. (%)                    | 0 (0)     | 0 (0)     | 0 (0)     |       |
| Type first DLI                         |           |           |           | 0.83  |
| pDLI – no. (%)                         | 20 (54)   | 17 (55)   | 3 (50)    |       |
| tDLI – no. (%)                         | 17 (46)   | 14 (45)   | 3 (50)    |       |
| Remission status before DLI1           |           |           |           | 0.24  |
| CR/CRi – no. (%)                       | 26 (70)   | 23 (74)   | 3 (50)    |       |
| No CR/CRi – no. (%)                    | 11 (30)   | 8 (26)    | 3 (50)    |       |
| WBC count at DLI                       |           |           |           | 0.57  |
| Median – (x 10 <sup>9</sup> /l)        | 4.5       | 4.7       | 4.1       |       |
| Range – (x 10 <sup>9</sup> /l)         | 0.3-11.9  | 0.3-11.9  | 0.8-7.6   |       |

|                                   |           |           |          |      |
|-----------------------------------|-----------|-----------|----------|------|
| Hemoglobin at DLI                 |           |           |          | 0.89 |
| Median – g/dL                     | 10.7      | 10.6      | 11.9     |      |
| Range – g/dL                      | 7.1-15.3  | 7.1-15.3  | 8-13.4   |      |
| Platelet count at DLI             |           |           |          | 0.14 |
| Median – (x 10 <sup>9</sup> /l)   | 112       | 143       | 66.5     |      |
| Range – (x 10 <sup>9</sup> /l)    | 0-274     | 0-274     | 17-141   |      |
| Blasts PB at DLI                  |           |           |          | 1    |
| Median – %                        | 0         | 0         | 0        |      |
| Range – %                         | 0-6       | 0-5       | 0-1      |      |
| Blasts BM at DLI                  |           |           |          | 0.96 |
| Median – %                        | 4         | 5         | 3        |      |
| Range – %                         | 0-50      | 0-50      | 0-5      |      |
| Missing – no. (%)                 | 25 (68)   | 22 (71)   | 3 (50)   |      |
| Time between alloHCT and DLI      |           |           |          | 0.93 |
| Median (month)                    | 8.1       | 7.7       | 9.5      |      |
| Range – %                         | 3.1-74.7  | 3.7-74.7  | 3.1-18.9 |      |
| Donor chimerism BM at DLI         |           |           |          | 0.65 |
| Median – %                        | 97        | 98.3      | 92       |      |
| Range – %                         | 37-100    | 37-100    | 90-99    |      |
| Missing – no. (%)                 | 26 (70)   | 23 (74)   | 3 (50)   |      |
| Donor chimerism PB at DLI         |           |           |          | 0.06 |
| Median – %                        | 99.9      | 100       | 27.5     |      |
| Range – %                         | 87-100    | 95.8-100  | 0.3-100  |      |
| Missing – no. (%)                 | 1 (3)     | 1 (3)     | 0 (0)    |      |
| Number of DLIs until FU90         |           |           |          | 0.2  |
| 1 – no. (%)                       | 13 (35)   | 10 (32)   | 3 (50)   |      |
| 2 – no. (%)                       | 18 (49)   | 17 (55)   | 1 (17)   |      |
| 3 – no. (%)                       | 6 (16)    | 4 (13)    | 2 (33)   |      |
| DLI starting dose                 |           |           |          | 0.93 |
| Median (*10 <sup>5</sup> CD3+/kg) | 50        | 50        | 27.5     |      |
| Range (*10 <sup>5</sup> CD3+/kg)  | 0.3-210   | 5-210     | 0.3-100  |      |
| DLI total dose until FU90         |           |           |          | 0.86 |
| Median (*10 <sup>5</sup> CD3+/kg) | 100       | 100       | 57.5     |      |
| Range (*10 <sup>5</sup> CD3+/kg)  | 0.3-1530  | 5-1530    | 0.3-900  |      |
| Age at DLI                        |           |           |          | 0.71 |
| Median (years)                    | 52.6      | 52        | 56.7     |      |
| Range (years)                     | 19.1-68.9 | 19.1-68.9 | 40-68.4  |      |
| Donor chimerism PB after DLI      |           |           |          | 0.1  |
| Median – %                        | 100       | 100       | 89       |      |
| Range – %                         | 24-100    | 94-100    | 24-100   |      |
| Missing – no. (%)                 | 9 (24)    | 8 (26)    | 1 (17)   |      |
| Acute GvHD after DLI1             |           |           |          | 0.45 |
| Yes – no. (%)                     | 8 (22)    | 6 (19)    | 2 (33)   |      |
| No – no. (%)                      | 29 (78)   | 25 (81)   | 4 (67)   |      |

|                                        |         |         |          |      |
|----------------------------------------|---------|---------|----------|------|
| Acute GvHD after DLI1 max grade        |         |         |          | 0.67 |
| Grade I or II – no. (%)                | 5 (63)  | 4 (67)  | 1 (50)   |      |
| Grade III or IV – no. (%)              | 3 (37)  | 2 (33)  | 1 (50)   |      |
| Chronic GvHD after DLI1                |         |         |          | 0.35 |
| Yes – no. (%)                          | 4 (11)  | 4 (13)  | 0 (0)    |      |
| No – no. (%)                           | 33 (89) | 27 (87) | 6 (100)  |      |
| Chronic GvHD after DLI1 max. grade     |         |         |          | -    |
| Limited – no. (%)                      | 2 (50)  | 2 (50)  | 0 (0)    |      |
| Extensive – no. (%)                    | 2 (50)  | 2 (50)  | 0 (0)    |      |
| AlloHCT2 after DLI1                    |         |         |          | 0.4  |
| Yes – no. (%)                          | 3 (8)   | 2 (6)   | 1 (17)   |      |
| No – no. (%)                           | 34 (92) | 29 (94) | 5 (83)   |      |
| CMV reactivation after DLI             |         |         |          | 0.12 |
| Yes – no. (%)                          | 5 (14)  | 3 (10)  | 2 (33)   |      |
| No – no. (%)                           | 32 (86) | 28 (90) | 4 (67)   |      |
| Cause of death                         |         |         |          | 0.41 |
| Alive – no. (%)                        | 17 (46) | 16 (52) | 1 (16.7) |      |
| Relapse – no. (%)                      | 9 (24)  | 6 (19)  | 3 (50)   |      |
| Infection – no. (%)                    | 2 (5)   | 2 (6)   | 0 (0)    |      |
| Chronic GvHD – no. (%)                 | 4 (11)  | 3 (10)  | 1 (16.7) |      |
| Other/unknown – no. (%)                | 5 (14)  | 4 (13)  | 1 (16.7) |      |
| Treatment between DLI and FU90         |         |         |          | 0.44 |
| No additional treatment – no. (%)      | 10 (27) | 7 (23)  | 3 (50)   |      |
| Only DLI – no. (%)                     | 21 (57) | 19 (61) | 2 (33)   |      |
| Non-intensive therapy (+DLI) – no. (%) | 2 (5)   | 2 (6)   | 1 (17)   |      |
| Intensive therapy (+DLI) – no. (%)     | 4 (11)  | 3 (10)  | 0 (0)    |      |
| Treatment after FU90                   |         |         |          | 0.16 |
| No – no. (%)                           | 22 (60) | 20 (65) | 2 (33.3) |      |
| DLIs only – no. (%)                    | 3 (8)   | 3 (10)  | 0 (0)    |      |
| Non-intensive treatment – no. (%)      | 5 (13)  | 2 (6)   | 2 (33.3) |      |
| Intensive treatment – no. (%)          | 7 (19)  | 6 (19)  | 2 (33.3) |      |

Abbreviations: alloHCT, allogeneic hematopoietic cell transplantation; BM, bone marrow; CMV, cytomegalovirus; CR, complete remission; CRi, CR with incomplete haematological recovery; DLI, donor lymphocyte infusion; DRI, disease risk index; FU90, follow up time point 90 days after DLI; GvHD, graft versus host disease; HCT-CI, Hematopoietic Cell Transplantation-specific Comorbidity Index; MRD, matched related donor; MMRD, mismatched related

donor; MMUD, mismatched unrelated donor; MUD, matched unrelated donor; PB, peripheral blood; pDLI, preemptive DLI; tDLI, therapeutic DLI; WBC, white blood cell.

**Supplementary Table S14:** Molecular characteristics at diagnosis of patients in CR/CRi at FU90.

| Mutational class at diagnosis | All (n=37) | MRD <sup>-</sup> FU90 (n=31) | MRD <sup>+</sup> FU90 (n=6) | p     |
|-------------------------------|------------|------------------------------|-----------------------------|-------|
| Epigenetic modifier           |            |                              |                             | 0.34  |
| Mutated – no. (%)             | 19 (51)    | 17 (55)                      | 2 (33)                      |       |
| Wild type – no. (%)           | 18 (49)    | 14 (45)                      | 4 (67)                      |       |
| Nucleophosmin                 |            |                              |                             | 0.35  |
| Mutated – no. (%)             | 4 (11)     | 4 (13)                       | 0 (0)                       |       |
| Wild type – no. (%)           | 33 (89)    | 27 (87)                      | 6 (100)                     |       |
| Chromatin modifier            |            |                              |                             | 0.35  |
| Mutated – no. (%)             | 4 (11)     | 4 (13)                       | 0 (0)                       |       |
| Wild type – no. (%)           | 33 (89)    | 27 (87)                      | 6 (100)                     |       |
| Cohesin complex               |            |                              |                             | 0.97  |
| Mutated – no. (%)             | 6 (16)     | 5 (16)                       | 1 (17)                      |       |
| Wild type – no. (%)           | 31 (84)    | 26 (84)                      | 5 (63)                      |       |
| Signal transduction           |            |                              |                             | 0.59  |
| Mutated – no. (%)             | 16 (43)    | 14 (45)                      | 2 (33)                      |       |
| Wild type – no. (%)           | 21 (57)    | 17 (55)                      | 4 (67)                      |       |
| Spliceosome                   |            |                              |                             | 0.61  |
| Mutated – no. (%)             | 4 (11)     | 3 (10)                       | 1 (17)                      |       |
| Wild type – no. (%)           | 33 (89)    | 28 (90)                      | 5 (63)                      |       |
| Myeloid Transcription factor  |            |                              |                             | 0.017 |
| Mutated – no. (%)             | 10 (27)    | 6 (19)                       | 4 (67)                      |       |
| Wild type – no. (%)           | 27 (73)    | 25 (81)                      | 2 (33)                      |       |
| Tumor suppressor              |            |                              |                             | 0.2   |
| Mutated – no. (%)             | 7 (19)     | 7 (23)                       | 0 (0)                       |       |
| Wild type – no. (%)           | 30 (81)    | 24 (77)                      | 6 (100)                     |       |

**Supplementary Table S15:** Univariate analysis of all considered variables for CIR, NRM, RFS and OS for patients in CR/CRi at FU90 (n=37). See excel file “Supplementary Table S15”.

**Supplementary Table S16:** Baseline characteristics of patients who were MRD<sup>+</sup> and in CR/CRi before DLI vs. a control cohort without DLI and MRD<sup>+</sup> after alloHCT.

| Characteristic                       | All (n=91) | no DLI (n=68) | DLI (n=23) | p     |
|--------------------------------------|------------|---------------|------------|-------|
| Age at diagnosis                     |            |               |            | 0.22  |
| Median – (years)                     | 51.7       | 53.7          | 50.7       |       |
| Range – (years)                      | 18.3-70.8  | 19-70.8       | 18.3-65.5  |       |
| Patient sex                          |            |               |            | 0.06  |
| Male – no. (%)                       | 51 (56)    | 42 (62)       | 9 (39)     |       |
| Female – no. (%)                     | 40 (44)    | 26 (38)       | 14 (61)    |       |
| Diagnosis                            |            |               |            | 0.63  |
| De novo AML – no. (%)                | 63 (69)    | 48 (71)       | 15 (65)    |       |
| sAML / tAML / MDS/AML – no. (%)      | 28 (31)    | 20 (29)       | 8 (35)     |       |
| FAB-subtype                          |            |               |            | 0.13  |
| M0 + M1 + M2 – no. (%)               | 35 (39)    | 24 (35)       | 11 (49)    |       |
| M4 + M5 + M6 + M7 – no. (%)          | 32 (35)    | 27 (40)       | 5 (22)     |       |
| Not classifiable – no. (%)           | 24 (26)    | 17 (25)       | 7 (30)     |       |
| FLT3-ITD                             |            |               |            | 0.005 |
| Yes – no. (%)                        | 12 (13)    | 5 (7)         | 7 (30)     |       |
| No – no. (%)                         | 79 (87)    | 63 (93)       | 16 (70)    |       |
| Complex karyotype                    |            |               |            | 0.51  |
| Yes – no. (%)                        | 9 (10)     | 6 (9)         | 3 (13)     |       |
| No – no. (%)                         | 81 (89)    | 62 (91)       | 19 (83)    |       |
| Missing – no. (%)                    | 1 (1)      | 0 (0)         | 1 (4)      |       |
| MRC Grimwade                         |            |               |            | 0.38  |
| Favorable + Intermediate – no. (%)   | 75 (82)    | 58 (85)       | 17 (74)    |       |
| Adverse – no. (%)                    | 15 (17)    | 10 (15)       | 5 (22)     |       |
| Missing – no. (%)                    | 1 (1)      | 0 (0)         | 1 (4)      |       |
| ECOG performance status at diagnosis |            |               |            | 0.006 |
| ECOG 0 – no. (%)                     | 63 (69)    | 41 (61)       | 22 (96)    |       |
| ECOG 1 – no. (%)                     | 25 (28)    | 24 (35)       | 1 (4)      |       |
| ECOG 2 – no. (%)                     | 3 (3)      | 3 (4)         | 0 (0)      |       |
| HCT-CI at diagnosis                  |            |               |            | 0.24  |
| 0-2 – no. (%)                        | 76 (84)    | 55 (81)       | 21 (91)    |       |
| >2 – no. (%)                         | 15 (16)    | 13 (19)       | 2 (9)      |       |
| WBC count at diagnosis               |            |               |            | 0.75  |
| Median – (x 10 <sup>9</sup> /l)      | 12.3       | 8.30          | 23.9       |       |
| Range – (x 10 <sup>9</sup> /l)       | 0.7-223.5  | 0.7-223.5     | 1.2-115.2  |       |
| Missing – no. (%)                    | 19 (21)    | 13 (19)       | 6 (26)     |       |
| Hemoglobin at diagnosis              |            |               |            | 0.99  |



|                                 |         |          |        |      |
|---------------------------------|---------|----------|--------|------|
| Median – g/dL                   | 9.8     | 9.8      | 9.8    |      |
| Range – g/dL                    | 4.3-144 | 4.3-13.2 | 5-144  |      |
| Missing – no. (%)               | 19 (21) | 13 (19)  | 6 (26) |      |
| Platelet count at diagnosis     |         |          |        | 0.92 |
| Median – (x 10 <sup>9</sup> /l) | 63      | 57       | 53.5   |      |
| Range – (x 10 <sup>9</sup> /l)  | 7-305   | 11-305   | 7-212  |      |
| Missing – no. (%)               | 20 (22) | 13 (19)  | 7 (30) |      |

Abbreviations: BM, bone marrow; CMV, cytomegalovirus; CR, complete remission; CRi, CR with incomplete haematological recovery; ECOG, Eastern Cooperative Oncology Group; ELN, European leukemia net; FAB, French-American-British; HCT-CI, Hematopoietic Cell Transplantation-specific Comorbidity Index; ITD, internal tandem duplication; MDS, Myelodysplastic syndrome; MRC, Medical research council; PB, peripheral blood; sAML, secondary AML; tAML, therapy-related AML; WBC, white blood cell.

**Supplementary Table S17:** Treatment- and transplant-associated characteristics of patients who were MRD<sup>+</sup> and in CR/CRi before DLI and a control cohort without DLI and MRD<sup>+</sup> after alloHCT.

| Characteristic                | All (n=91) | no DLI (n=68) | DLI (n=23) | p    |
|-------------------------------|------------|---------------|------------|------|
| DRI score grouped             |            |               |            | 0.65 |
| Low + intermediate – no. (%)  | 59 (65)    | 45 (66)       | 14 (39)    |      |
| High + very high – no. (%)    | 32 (35)    | 23 (34)       | 9 (39)     |      |
| Remission status at alloHCT1  |            |               |            | 0.47 |
| First CR – no. (%)            | 52 (57)    | 40 (59)       | 12 (52)    |      |
| CRi – no. (%)                 | 4 (4)      | 3 (4)         | 1 (4)      |      |
| Partial remission – no. (%)   | 4 (4)      | 2 (3)         | 2 (9)      |      |
| Second CR – no. (%)           | 5 (6)      | 5 (7)         | 0 (0)      |      |
| No CR/CRi/PR – no. (%)        | 26 (29)    | 18 (27)       | 8 (35)     |      |
| Donor match at alloHCT1       |            |               |            | 0.13 |
| MRD – no. (%)                 | 25 (28)    | 15 (22)       | 10 (43)    |      |
| MUD – no. (%)                 | 44 (48)    | 36 (53)       | 8 (35)     |      |
| MMRD or MMUD – no. (%)        | 22 (24)    | 17 (25)       | 5 (22)     |      |
| Conditioning therapy alloHCT1 |            |               |            | 0.45 |

|                                        |           |           |           |        |
|----------------------------------------|-----------|-----------|-----------|--------|
| Myeloablative – no. (%)                | 26 (29)   | 18 (26)   | 8 (35)    |        |
| Reduced intensity – no. (%)            | 65 (71)   | 50 (74)   | 15 (65)   |        |
| Stem cell source at alloHCT1           |           |           |           | 0.07   |
| PB – no. (%)                           | 86 (95)   | 66 (97)   | 20 (87)   |        |
| BM – no. (%)                           | 5 (5)     | 2 (3)     | 3 (13)    |        |
| Donor sex alloHCT1                     |           |           |           | 0.02   |
| Male – no. (%)                         | 58 (64)   | 48 (71)   | 10 (43)   |        |
| Female – no. (%)                       | 33 (36)   | 20 (29)   | 13 (57)   |        |
| Donor age alloHCT1                     |           |           |           | 0.09   |
| Median (years)                         | 37.8      | 34.6      | 44        |        |
| Range (years)                          | 14.9-62.6 | 19.5-62.6 | 14.9-58.7 |        |
| Missing – no. (%)                      | 29 (32)   | 28 (41)   | 1 (4)     |        |
| Patient age alloHCT1                   |           |           |           | 0.28   |
| Median (years)                         | 52.1      | 53.7      | 50.3      |        |
| Range (years)                          | 18.5-70.8 | 19-70.8   | 18.5-68   |        |
| CMV status alloHCT1                    |           |           |           | 0.97   |
| Patient neg. /Donor neg. – no. (%)     | 33 (36)   | 25 (37)   | 8 (35)    |        |
| Any other constellation – no. (%)      | 57 (63)   | 43 (63)   | 14 (61)   |        |
| Missing – no. (%)                      | 1 (1)     | 0 (0)     | 1 (4)     |        |
| Chimerism at MRD measurement           |           |           |           | 0.74   |
| Median (years)                         | 100       | 100       | 100       |        |
| Range (years)                          | 77-100    | 97-100    | 77-100    |        |
| Missing – no. (%)                      | 2 (2)     | 1 (1)     | 1 (4)     |        |
| Acute GvHD after alloHCT1 before DLI   |           |           |           | <0.001 |
| Yes – no. (%)                          | 46 (51)   | 43 (63)   | 3 (13)    |        |
| No – no. (%)                           | 45 (49)   | 25 (37)   | 20 (87)   |        |
| Acute GvHD after alloHCT1 grade        |           |           |           | <0.001 |
| No – no. (%)                           | 45 (49)   | 25 (37)   | 20 (87)   |        |
| Grade I or II – no. (%)                | 35 (39)   | 32 (47)   | 3 (13)    |        |
| Grade III or IV – no. (%)              | 9 (10)    | 9 (13)    | 0 (0)     |        |
| Missing – no. (%)                      | 2 (2)     | 2 (3)     | 0 (0)     |        |
| Chronic GvHD after alloHCT1 before DLI |           |           |           | <0.001 |
| Yes – no. (%)                          | 36 (40)   | 34 (50)   | 2 (9)     |        |
| No – no. (%)                           | 55 (60)   | 34 (50)   | 21 (91)   |        |
| Chronic GvHD after alloHCT1 max. grade |           |           |           | 0.002  |
| No – no. (%)                           | 55 (60)   | 34 (50)   | 21 (91)   |        |
| Limited – no. (%)                      | 26 (29)   | 24 (35)   | 2 (9)     |        |
| Extensive – no. (%)                    | 10 (11)   | 10 (15)   | 0 (0)     |        |
| Cause of death                         |           |           |           | 0.006  |
| Alive – no. (%)                        | 72 (79)   | 56 (82)   | 16 (70)   |        |
| Relapse – no. (%)                      | 10 (11)   | 4 (6)     | 6 (26)    |        |
| Infection – no. (%)                    | 1 (1)     | 0 (0)     | 1 (4)     |        |
| Other/unknown – no. (%)                | 8 (9)     | 8 (12)    | 0 (0)     |        |

Abbreviations: alloHCT, allogeneic hematopoietic cell transplantation; BM, bone marrow; CMV, cytomegalovirus; CR, complete remission; CRi, CR with incomplete haematological recovery; DLI, donor lymphocyte infusion; DRI, disease risk index; FU90, follow up time point 90 days after DLI; GvHD, graft versus host disease; HCT-CI, Hematopoietic Cell Transplantation-specific Comorbidity Index; MRD, matched related donor; MMRD, mismatched related donor; MMUD, mismatched unrelated donor; MUD, matched unrelated donor; PB, peripheral blood.
