# Supplementary material for: MRD as Biomarker for Response to Donor Lymphocyte Infusion after Allogeneic Hematopoietic Cell Transplantation in Patients with AML
Source: MDPI journal article supplement (doi:10.3390/cancers15153911), 2023-08-01
Supplement: s1 [file s1]

**Supplementary Table S15: Variables for univariate analysis in 37 patients who are in CR/CRI at FU90.**

| Variables                                 | N patients | First category (name)    | Second category (name) | First category (n) | Second category (n) | Cumulative incidence of relapse |                      |                      |       |                           |                           | Selected for multivariate analysis |
|-------------------------------------------|------------|--------------------------|------------------------|--------------------|---------------------|---------------------------------|----------------------|----------------------|-------|---------------------------|---------------------------|------------------------------------|
|                                           |            |                          |                        |                    |                     | HR#                             | 95% CI (lower limit) | 95% CI (upper limit) | P     | 5 year CIR (%) category 1 | 5 year CIR (%) category 2 |                                    |
| pre DLI median Age                        | 37         | Age 54 years or younger  | Age above 54 years     | 21                 | 16                  | 0.55                            | 0.17                 | 1.74                 | 0.312 | 39                        | 19                        |                                    |
| Patient sex                               | 37         | Female                   | Male                   | 19                 | 18                  | 0.50                            | 0.15                 | 1.63                 | 0.247 | 37                        | 22                        |                                    |
| Diagnosis                                 | 37         | De novo AML              | sAML / tAML / MDS/AML  | 23                 | 14                  | 1.38                            | 0.42                 | 4.56                 | 0.598 | 26                        | 36                        |                                    |
| Extramedullary manifestation at diagnosis | 37         | No                       | Yes                    | 32                 | 5                   | 0.62                            | 0.07                 | 5.70                 | 0.673 | 31                        | NA                        |                                    |
| FAB subtype                               | 23         | M0 + M1 + M2             | M4 + M5 + M6 + M7      | 16                 | 7                   | 0.69                            | 0.13                 | 3.69                 | 0.667 | 38                        | 29                        |                                    |
| FLT3-ITD status at diagnosis              | 37         | No                       | Yes                    | 29                 | 8                   | 0.30                            | 0.04                 | 2.32                 | 0.251 | 35                        | 12                        |                                    |
| Complex karyotype                         | 37         | No                       | Yes                    | 32                 | 5                   | 3.22                            | 0.85                 | 12.25                | 0.086 | 25                        | NA                        | 1                                  |
| 2022 ELN risk group                       | 34         | Favorable + Intermediate | Adverse                | 19                 | 15                  | 1.07                            | 0.33                 | 3.40                 | 0.912 | 26                        | 33                        |                                    |
| MRC Grimwade                              | 37         | Favorable + Intermediate | Adverse                | 27                 | 10                  | 2.68                            | 0.84                 | 8.53                 | 0.095 | 22                        | 50                        | 2                                  |
| ECOG performance status at diagnosis      | 37         | ECOG 0                   | ECOG 1                 | 35                 | 2                   | 1.29                            | 0.34                 | 4.87                 | 0.709 | 32                        | 0                         | *                                  |
| HCT-CI at diagnosis                       | 37         | 0-2                      | >2                     | 32                 | 5                   | 2.54                            | 0.70                 | 9.26                 | 0.156 | 28                        | 40                        |                                    |
| WBC count at diagnosis                    | 27         | Median or less           | Above median           | 16                 | 11                  | 0.66                            | 0.18                 | 2.46                 | 0.532 | 38                        | 27                        |                                    |

|                                               |    |                          |                         |    |    |      |      |       |       |    |    |   |
|-----------------------------------------------|----|--------------------------|-------------------------|----|----|------|------|-------|-------|----|----|---|
| Hemoglobin at diagnosis                       | 27 | Median or less           | Above median            | 13 | 14 | 1.69 | 0.52 | 5.51  | 0.388 | 23 | 43 |   |
| Platelet count at diagnosis                   | 27 | Median or less           | Above median            | 15 | 12 | 0.45 | 0.12 | 1.64  | 0.224 | 47 | 17 |   |
| Number of chemotherapy cycles before alloHCT1 | 37 | 0-1 cycles               | ≥2                      | 9  | 28 | 1.83 | 0.43 | 7.83  | 0.416 | 22 | 32 |   |
| Donor match at alloHCT1                       | 37 | MRD                      | MUD                     | 13 | 16 | 1.10 | 0.30 | 4.03  | 0.890 | 31 | 31 |   |
| Donor match at alloHCT1                       | 37 | MRD                      | MMRD or MMUD            | 13 | 8  | 1.14 | 0.29 | 4.53  | 0.850 | 31 | 31 |   |
| Conditioning therapy alloHCT1                 | 37 | Myeloablative            | Reduced intensity       | 10 | 27 | 1.85 | 0.43 | 8.01  | 0.413 | 20 | 33 |   |
| Stem cell source at alloHCT1                  | 37 | PB                       | BM                      | 29 | 8  | 2.04 | 0.65 | 6.38  | 0.221 | 28 | 38 |   |
| Donor sex alloHCT1                            | 37 | Female                   | Male                    | 16 | 21 | 1.05 | 0.34 | 3.18  | 0.936 | 31 | 29 |   |
| Donor age alloHCT1                            | 36 | Age 36 years or younger  | Age above 36 years      | 17 | 19 | 0.91 | 0.30 | 2.72  | 0.861 | 30 | 32 |   |
| CMV status alloHCT1                           | 37 | Patient neg. /Donor neg. | Any other constellation | 13 | 24 | 1.75 | 0.46 | 6.58  | 0.409 | 23 | 34 |   |
| Epigenetic modifier pre DLI                   | 37 | MRD-                     | MRD+                    | 26 | 11 | 1.17 | 0.37 | 3.70  | 0.790 | 31 | 27 |   |
| Nucleophosmin preDLI                          | 37 | MRD-                     | MRD+                    | 33 | 4  | 0.00 | 0.00 | 0.00  | 0.000 | 34 | NA | * |
| Cohesin complex preDLI                        | 37 | MRD-                     | MRD+                    | 35 | 2  | 5.33 | 2.24 | 12.71 | 0.000 | 26 | NA | * |
| Signal transduction preDLI                    | 37 | MRD-                     | MRD+                    | 33 | 4  | 0.00 | 0.00 | 0.00  | 0.000 | 34 | NA | * |

|                                     |    |                    |                  |    |    |      |      |      |       |    |    |   |
|-------------------------------------|----|--------------------|------------------|----|----|------|------|------|-------|----|----|---|
| Spliceosome preDLI                  | 37 | MRD-               | MRD+             | 34 | 3  | 0.95 | 0.16 | 5.56 | 0.957 | 30 | NA | * |
| Myeloid Transcription factor preDLI | 37 | MRD-               | MRD+             | 31 | 6  | 0.39 | 0.06 | 2.51 | 0.319 | 32 | 17 |   |
| Tumor suppressor preDLI             | 37 | MRD-               | MRD+             | 34 | 3  | 0.00 | 0.00 | 0.00 | 0.000 | 33 | 0  | * |
| DRI Score grouped                   | 37 | Low + intermediate | High + very high | 23 | 14 | 1.96 | 0.63 | 6.04 | 0.243 | 22 | 43 |   |
| FU90 MRD status                     | 37 | Negative           | Positive         | 31 | 6  | 3.02 | 1.02 | 8.94 | 0.047 | 23 | NA | 3 |

|                                                        |   |
|--------------------------------------------------------|---|
| Number of selected variables for multivariate analysis | 3 |
|--------------------------------------------------------|---|

| Variables                                 | N patients | First category (name)   | Second category (name) | First category (n) | Second category (n) | Non relapse mortality |                      |                      |       |                           |                           | Selected for multivariate analysis |
|-------------------------------------------|------------|-------------------------|------------------------|--------------------|---------------------|-----------------------|----------------------|----------------------|-------|---------------------------|---------------------------|------------------------------------|
|                                           |            |                         |                        |                    |                     | HR#                   | 95% CI (lower limit) | 95% CI (upper limit) | P     | 5 year NRM (%) category 1 | 5 year NRM (%) category 2 |                                    |
| pre DLI median Age                        | 37         | Age 54 years or younger | Age above 54 years     | 21                 | 16                  | 5.79                  | 1.24                 | 27.1                 | 0.026 | 10                        | 46                        | 1                                  |
| Patient sex                               | 37         | Female                  | Male                   | 19                 | 18                  | 2.57                  | 0.68                 | 9.77                 | 0.166 | 18                        | 35                        |                                    |
| Diagnosis                                 | 37         | De novo AML             | sAML / tAML / MDS/AML  | 23                 | 14                  | 1.56                  | 0.48                 | 5.05                 | 0.462 | 23                        | 31                        |                                    |
| Extramedullary manifestation at diagnosis | 37         | No                      | Yes                    | 32                 | 5                   | 4.78                  | 1.10                 | 20.9                 | 0.037 | 22                        | NA                        | 2                                  |
| FAB subtype                               | 23         | M0 + M1 + M2            | M4 + M5 + M6 + M7      | 16                 | 7                   | 4.15                  | 0.76                 | 22.8                 | 0.101 | 13                        | 43                        |                                    |
| FLT3-ITD status at diagnosis              | 37         | No                      | Yes                    | 29                 | 8                   | 1.47                  | 0.43                 | 5.07                 | 0.540 | 22                        | 41                        |                                    |

|                                               |    |                          |                    |    |    |      |      |      |       |    |    |   |
|-----------------------------------------------|----|--------------------------|--------------------|----|----|------|------|------|-------|----|----|---|
| Complex karyotype                             | 37 | No                       | Yes                | 32 | 5  | 0.82 | 0.10 | 6.74 | 0.853 | 27 | NA |   |
| 2022 ELN risk group                           | 34 | Favorable + Intermediate | Adverse            | 19 | 15 | 1.31 | 0.40 | 4.30 | 0.652 | 30 | 29 |   |
| MRC Grimwade                                  | 37 | Favorable + Intermediate | Adverse            | 27 | 10 | 0.76 | 0.16 | 3.58 | 0.731 | 28 | 20 |   |
| ECOG performance status at diagnosis          | 37 | ECOG 0                   | ECOG 1             | 35 | 2  | 0.00 | 0.00 | 0.00 | 0.000 | 28 | 0  | * |
| HCT-CI at diagnosis                           | 37 | 0-2                      | >2                 | 32 | 5  | 0.68 | 0.07 | 6.19 | 0.731 | 28 | 20 |   |
| WBC count at diagnosis                        | 27 | Median or less           | Above median       | 16 | 11 | 1.73 | 0.38 | 7.94 | 0.483 | 16 | 27 |   |
| Hemoglobin at diagnosis                       | 27 | Median or less           | Above median       | 13 | 14 | 0.93 | 0.20 | 4.36 | 0.924 | 15 | 25 |   |
| Platelet count at diagnosis                   | 27 | Median or less           | Above median       | 15 | 12 | 1.31 | 0.28 | 6.02 | 0.729 | 13 | 28 |   |
| Number of chemotherapy cycles before alloHCT1 | 37 | 0-1 cycles               | ≥2                 | 9  | 28 | 0.67 | 0.19 | 2.40 | 0.537 | 22 | 27 |   |
| Donor match at alloHCT1                       | 37 | MRD                      | MUD                | 13 | 16 | 1.58 | 0.39 | 6.44 | 0.520 | 23 | 35 |   |
| Donor match at alloHCT1                       | 37 | MRD                      | MMRD or MMUD       | 13 | 8  | 0.41 | 0.05 | 3.56 | 0.420 | 23 | 35 |   |
| Conditioning therapy alloHCT1                 | 37 | Myeloablative            | Reduced intensity  | 10 | 27 | 2.95 | 0.35 | 24.7 | 0.319 | 10 | 31 |   |
| Stem cell source at alloHCT1                  | 37 | PB                       | BM                 | 29 | 8  | 0.34 | 0.04 | 2.64 | 0.303 | 31 | 12 |   |
| Donor sex alloHCT1                            | 37 | Female                   | Male               | 16 | 21 | 3.01 | 0.65 | 14.1 | 0.161 | 12 | 35 |   |
| Donor age alloHCT1                            | 36 | Age 36 years or younger  | Age above 36 years | 17 | 19 | 0.33 | 0.08 | 1.38 | 0.129 | 44 | 16 |   |

|                                           |    |                             |                            |    |    |      |      |      |       |    |    |   |
|-------------------------------------------|----|-----------------------------|----------------------------|----|----|------|------|------|-------|----|----|---|
| CMV status<br>alloHCT1                    | 37 | Patient neg.<br>/Donor neg. | Any other<br>constellation | 13 | 24 | 2.66 | 0.59 | 11.9 | 0.200 | 8  | 39 |   |
| Epigenetic<br>modifier pre DLI            | 37 | MRD-                        | MRD+                       | 26 | 11 | 2.51 | 0.77 | 8.20 | 0.128 | 17 | 45 |   |
| Nucleophosmin<br>preDLI                   | 37 | MRD-                        | MRD+                       | 33 | 4  | 8.91 | 2.46 | 32.3 | 0.001 | 20 | NA | * |
| Cohesin complex<br>preDLI                 | 37 | MRD-                        | MRD+                       | 35 | 2  | 0.00 | 0.00 | 0.00 | 0.000 | 28 | NA | * |
| Signal<br>transduction<br>preDLI          | 37 | MRD-                        | MRD+                       | 33 | 4  | 7.72 | 2.13 | 27.9 | 0.002 | 20 | NA | * |
| Spliceosome<br>preDLI                     | 37 | MRD-                        | MRD+                       | 34 | 3  | 1.42 | 0.17 | 11.6 | 0.746 | 26 | NA | * |
| Myeloid<br>Transcription<br>factor preDLI | 37 | MRD-                        | MRD+                       | 31 | 6  | 1.25 | 0.32 | 4.87 | 0.751 | 23 | 52 |   |
| Tumor suppressor<br>preDLI                | 37 | MRD-                        | MRD+                       | 34 | 3  | 3.82 | 1.24 | 11.8 | 0.020 | 26 | 33 |   |
| DRI Score grouped                         | 37 | Low +<br>intermediate       | High + very<br>high        | 23 | 14 | 1.11 | 0.32 | 3.82 | 0.866 | 30 | 21 |   |
| FU90 MRD status                           | 37 | Negative                    | Positive                   | 31 | 6  | 1.13 | 0.30 | 4.27 | 0.860 | 24 | NA |   |

Number of  
selected variables  
for multivariate  
analysis

2

Relapse free survival

| Variables                                 | N patients | First category (name)    | Second category (name) | First category (n) | Second category (n) | HR#  | 95% CI (lower limit) | 95% CI (upper limit) | P     | 5 year RFS (%) category 1 | 5 year RFS (%) category 2 | Selected for multivariate analysis |
|-------------------------------------------|------------|--------------------------|------------------------|--------------------|---------------------|------|----------------------|----------------------|-------|---------------------------|---------------------------|------------------------------------|
| pre DLI median Age                        | 37         | Age 54 years or younger  | Age above 54 years     | 21                 | 16                  | 1.54 | 0.67                 | 3.58                 | 0.312 | 52                        | 35                        |                                    |
| Patient sex                               | 37         | Female                   | Male                   | 19                 | 18                  | 1.09 | 0.47                 | 2.51                 | 0.848 | 45                        | 42                        |                                    |
| Diagnosis                                 | 37         | De novo AML              | sAML / tAML / MDS/AML  | 23                 | 14                  | 1.64 | 0.70                 | 3.81                 | 0.253 | 51                        | 33                        |                                    |
| Extramedullary manifestation at diagnosis | 37         | No                       | Yes                    | 32                 | 5                   | 3.59 | 1.19                 | 10.86                | 0.024 | 47                        | NA                        | 1                                  |
| FAB subtype                               | 23         | M0 + M1 + M2             | M4 + M5 + M6 + M7      | 16                 | 7                   | 2.05 | 0.68                 | 6.18                 | 0.204 | 49                        | 29                        |                                    |
| FLT3-ITD status at diagnosis              | 37         | No                       | Yes                    | 29                 | 8                   | 0.66 | 0.22                 | 1.97                 | 0.455 | 43                        | 47                        |                                    |
| Complex karyotype                         | 37         | No                       | Yes                    | 32                 | 5                   | 3.17 | 1.02                 | 9.90                 | 0.047 | 48                        | NA                        | 2                                  |
| 2022 ELN risk group                       | 34         | Favorable + Intermediate | Adverse                | 19                 | 15                  | 1.29 | 0.55                 | 3.06                 | 0.557 | 44                        | 37                        |                                    |
| MRC Grimwade                              | 37         | Favorable + Intermediate | Adverse                | 27                 | 10                  | 2.24 | 0.89                 | 5.62                 | 0.087 | 50                        | 30                        |                                    |
| ECOG performance status at diagnosis      | 37         | ECOG 0                   | ECOG 1                 | 35                 | 2                   | 0.47 | 0.06                 | 3.56                 | 0.467 | 40                        | 100                       | *                                  |
| HCT-CI at diagnosis                       | 37         | 0-2                      | >2                     | 32                 | 5                   | 1.75 | 0.58                 | 5.29                 | 0.323 | 44                        | 40                        |                                    |
| WBC count at diagnosis                    | 27         | Median or less           | Above median           | 16                 | 11                  | 1.15 | 0.41                 | 3.24                 | 0.792 | 46                        | 45                        |                                    |
| Hemoglobin at diagnosis                   | 27         | Median or less           | Above median           | 13                 | 14                  | 1.52 | 0.56                 | 4.10                 | 0.408 | 62                        | 32                        |                                    |

|                                               |    |                          |                         |    |    |      |      |       |       |    |    |   |
|-----------------------------------------------|----|--------------------------|-------------------------|----|----|------|------|-------|-------|----|----|---|
| Platelet count at diagnosis                   | 27 | Median or less           | Above median            | 15 | 12 | 0.62 | 0.22 | 1.73  | 0.360 | 40 | 56 |   |
| Number of chemotherapy cycles before alloHCT1 | 37 | 0-1 cycles               | ≥2                      | 9  | 28 | 1.11 | 0.41 | 3.02  | 0.834 | 56 | 41 |   |
| Donor match at alloHCT1                       | 37 | MRD                      | MUD                     | 13 | 16 | 1.40 | 0.53 | 3.67  | 0.497 | 46 | 33 |   |
| Donor match at alloHCT1                       | 37 | MRD                      | MMRD or MMUD            | 13 | 8  | 0.64 | 0.19 | 2.20  | 0.477 | 46 | 33 |   |
| Conditioning therapy alloHCT1                 | 37 | Myeloablative            | Reduced intensity       | 10 | 27 | 2.40 | 0.71 | 8.16  | 0.161 | 70 | 36 |   |
| Stem cell source at alloHCT1                  | 37 | PB                       | BM                      | 29 | 8  | 1.01 | 0.37 | 2.74  | 0.988 | 41 | 50 |   |
| Donor sex alloHCT1                            | 37 | Female                   | Male                    | 16 | 21 | 1.71 | 0.70 | 4.21  | 0.240 | 56 | 37 |   |
| Donor age alloHCT1                            | 36 | Age 36 years or younger  | Age above 36 years      | 17 | 19 | 0.53 | 0.22 | 1.26  | 0.153 | 26 | 53 |   |
| CMV status alloHCT1                           | 37 | Patient neg. /Donor neg. | Any other constellation | 13 | 24 | 2.61 | 0.95 | 7.19  | 0.064 | 69 | 27 | 3 |
| Epigenetic modifier pre DLI                   | 37 | MRD-                     | MRD+                    | 26 | 11 | 1.84 | 0.78 | 4.32  | 0.161 | 52 | 27 |   |
| Nucleophosmin preDLI                          | 37 | MRD-                     | MRD+                    | 33 | 4  | 1.95 | 0.56 | 6.75  | 0.292 | 47 | NA |   |
| Cohesin complex preDLI                        | 37 | MRD-                     | MRD+                    | 35 | 2  | 2.62 | 0.59 | 11.57 | 0.204 | 46 | NA |   |
| Signal transduction preDLI                    | 37 | MRD-                     | MRD+                    | 33 | 4  | 1.74 | 0.50 | 6.03  | 0.384 | 47 | NA |   |
| Spliceosome preDLI                            | 37 | MRD-                     | MRD+                    | 34 | 3  | 1.27 | 0.29 | 5.49  | 0.748 | 44 | NA |   |

|                                     |    |                    |                  |    |    |      |      |      |       |    |    |   |
|-------------------------------------|----|--------------------|------------------|----|----|------|------|------|-------|----|----|---|
| Myeloid Transcription factor preDLI | 37 | MRD-               | MRD+             | 31 | 6  | 0.60 | 0.18 | 2.03 | 0.410 | 44 | 31 |   |
| Tumor suppressor preDLI             | 37 | MRD-               | MRD+             | 34 | 3  | 1.23 | 0.29 | 5.27 | 0.785 | 42 | 67 |   |
| DRI Score grouped                   | 37 | Low + intermediate | High + very high | 23 | 14 | 1.90 | 0.81 | 4.43 | 0.138 | 48 | 36 |   |
| FU90 MRD status                     | 37 | Negative           | Positive         | 31 | 6  | 2.27 | 0.87 | 5.92 | 0.095 | 54 | NA | 4 |

|                                                        |   |
|--------------------------------------------------------|---|
| Number of selected variables for multivariate analysis | 4 |
|--------------------------------------------------------|---|

| Variables                                 | N patients | First category (name)   | Second category (name) | First category (n) | Second category (n) | Overall survival |                      |                      |       |                          |                          | Selected for multivariate analysis |
|-------------------------------------------|------------|-------------------------|------------------------|--------------------|---------------------|------------------|----------------------|----------------------|-------|--------------------------|--------------------------|------------------------------------|
|                                           |            |                         |                        |                    |                     | HR#              | 95% CI (lower limit) | 95% CI (upper limit) | P     | 5 year OS (%) category 1 | 5 year OS (%) category 2 |                                    |
| pre DLI median Age                        | 37         | Age 54 years or younger | Age above 54 years     | 21                 | 16                  | 1.46             | 0.61                 | 3.50                 | 0.401 | 45                       | 39                       |                                    |
| Patient sex                               | 37         | Female                  | Male                   | 19                 | 18                  | 1.33             | 0.55                 | 3.21                 | 0.528 | 45                       | 40                       |                                    |
| Diagnosis                                 | 37         | De novo AML             | sAML / tAML / MDS/AML  | 23                 | 14                  | 1.85             | 0.77                 | 4.46                 | 0.171 | 51                       | 33                       |                                    |
| Extramedullary manifestation at diagnosis | 37         | No                      | Yes                    | 32                 | 5                   | 3.91             | 1.27                 | 12.03                | 0.017 | 46                       | NA                       | 1                                  |
| FAB subtype                               | 23         | M0 + M1 + M2            | M4 + M5 + M6 + M7      | 16                 | 7                   | 2.17             | 0.68                 | 6.89                 | 0.188 | 48                       | 29                       |                                    |
| FLT3-ITD status at diagnosis              | 37         | No                      | Yes                    | 29                 | 8                   | 0.67             | 0.22                 | 2.00                 | 0.470 | 43                       | 40                       |                                    |



|                                               |    |                          |                    |    |    |      |      |       |       |    |     |   |
|-----------------------------------------------|----|--------------------------|--------------------|----|----|------|------|-------|-------|----|-----|---|
| Complex karyotype                             | 37 | No                       | Yes                | 32 | 5  | 4.19 | 1.25 | 14.07 | 0.021 | 48 | NA  | 2 |
| 2022 ELN risk group                           | 34 | Favorable + Intermediate | Adverse            | 19 | 15 | 1.60 | 0.65 | 3.96  | 0.306 | 45 | 34  |   |
| MRC Grimwade                                  | 37 | Favorable + Intermediate | Adverse            | 27 | 10 | 2.64 | 1.02 | 6.82  | 0.045 | 51 | 20  | 3 |
| ECOG performance status at diagnosis          | 37 | ECOG 0                   | ECOG 1             | 35 | 2  | 0.00 | 0.00 | NA    | 0.998 | 39 | 100 | * |
| HCT-CI at diagnosis                           | 37 | 0-2                      | >2                 | 32 | 5  | 1.41 | 0.41 | 4.87  | 0.583 | 42 | 40  |   |
| WBC count at diagnosis                        | 27 | Median or less           | Above median       | 16 | 11 | 1.25 | 0.43 | 3.62  | 0.679 | 48 | 44  |   |
| Hemoglobin at diagnosis                       | 27 | Median or less           | Above median       | 13 | 14 | 2.09 | 0.70 | 6.23  | 0.188 | 66 | 29  |   |
| Platelet count at diagnosis                   | 27 | Median or less           | Above median       | 15 | 12 | 0.65 | 0.22 | 1.94  | 0.439 | 39 | 56  |   |
| Number of chemotherapy cycles before alloHCT1 | 37 | 0-1 cycles               | ≥2                 | 9  | 28 | 1.32 | 0.44 | 3.96  | 0.619 | 58 | 39  |   |
| Donor match at alloHCT1                       | 37 | MRD                      | MUD                | 13 | 16 | 1.42 | 0.54 | 3.74  | 0.483 | 37 | 39  |   |
| Donor match at alloHCT1                       | 37 | MRD                      | MMRD or MMUD       | 13 | 8  | 0.55 | 0.14 | 2.12  | 0.383 | 37 | 39  |   |
| Conditioning therapy alloHCT1                 | 37 | Myeloablative            | Reduced intensity  | 10 | 27 | 2.33 | 0.68 | 7.97  | 0.178 | 54 | 38  |   |
| Stem cell source at alloHCT1                  | 37 | PB                       | BM                 | 29 | 8  | 0.73 | 0.24 | 2.18  | 0.570 | 43 | 45  |   |
| Donor sex alloHCT1                            | 37 | Female                   | Male               | 16 | 21 | 1.49 | 0.59 | 3.74  | 0.396 | 47 | 39  |   |
| Donor age alloHCT1                            | 36 | Age 36 years or younger  | Age above 36 years | 17 | 19 | 0.59 | 0.24 | 1.44  | 0.248 | 27 | 51  |   |

|                                           |    |                             |                            |    |    |      |      |      |       |    |    |   |
|-------------------------------------------|----|-----------------------------|----------------------------|----|----|------|------|------|-------|----|----|---|
| CMV status<br>alloHCT1                    | 37 | Patient neg.<br>/Donor neg. | Any other<br>constellation | 13 | 24 | 3.01 | 0.99 | 9.11 | 0.052 | 77 | 23 | 4 |
| Epigenetic<br>modifier pre DLI            | 37 | MRD-                        | MRD+                       | 26 | 11 | 1.66 | 0.68 | 4.07 | 0.268 | 51 | 27 |   |
| Nucleophosmin<br>preDLI                   | 37 | MRD-                        | MRD+                       | 33 | 4  | 2.48 | 0.69 | 8.91 | 0.164 | 46 | NA |   |
| Cohesin complex<br>preDLI                 | 37 | MRD-                        | MRD+                       | 35 | 2  | 1.01 | 0.13 | 7.66 | 0.992 | 44 | NA | * |
| Signal<br>transduction<br>preDLI          | 37 | MRD-                        | MRD+                       | 33 | 4  | 2.37 | 0.66 | 8.50 | 0.187 | 46 | NA |   |
| Spliceosome<br>preDLI                     | 37 | MRD-                        | MRD+                       | 34 | 3  | 0.71 | 0.09 | 5.29 | 0.734 | 42 | NA | * |
| Myeloid<br>Transcription<br>factor preDLI | 37 | MRD-                        | MRD+                       | 31 | 6  | 0.83 | 0.24 | 2.84 | 0.762 | 45 | 27 |   |
| Tumor suppressor<br>preDLI                | 37 | MRD-                        | MRD+                       | 34 | 3  | 1.38 | 0.32 | 5.96 | 0.667 | 41 | 67 | * |
| DRI Score grouped                         | 37 | Low +<br>intermediate       | High + very<br>high        | 23 | 14 | 2.03 | 0.84 | 4.94 | 0.118 | 44 | 43 |   |
| FU90 MRD status                           | 37 | Negative                    | Positive                   | 31 | 6  | 1.86 | 0.67 | 5.18 | 0.236 | 52 | NA |   |

|                                                        |   |
|--------------------------------------------------------|---|
| Number of selected variables for multivariate analysis | 4 |
|--------------------------------------------------------|---|

\* not considered due to lack of any events or too few patients in one of the categories

#Hazard ratios greater than or less than 1 indicate an increased or decreased risk, respectively, of an event for the second category listed.

Abbreviations: CI, confidence interval; CMV, cytomegalovirus; CR, complete remission; ECOG, Eastern Cooperative Group performance status; ELN, European LeukemiaNet; HCT, hematopoietic cell transplantation; HCT-CI, hematopoietic cell transplantation comorbidity index; HR, hazard ratio; ITD, internal tandem duplication; MMRD, mismatched related donor; MMUD, mismatched unrelated donor; MRDonor, matched related donor; MUD, matched unrelated donor; MRD, measurable residual disease; MVA, multivariate Analysis; P, P value; WBC, white blood cell count.
