# Supplementary material for: MRD as Biomarker for Response to Donor Lymphocyte Infusion after Allogeneic Hematopoietic Cell Transplantation in Patients with AML
Source: MDPI journal article supplement (doi:10.3390/cancers15153911), 2023-08-01
Supplement: s1 [file s1]

**Supplementary Table S7: Univariate analysis variables for 76 patient cohort (all)**

| Variables                                 | N patients | First category (name)    | Second category (name) | First category (n) | Second category (n) | Event free survival |                      |                      |       |                           |                           | Selected for multivariate analysis |
|-------------------------------------------|------------|--------------------------|------------------------|--------------------|---------------------|---------------------|----------------------|----------------------|-------|---------------------------|---------------------------|------------------------------------|
|                                           |            |                          |                        |                    |                     | HR#                 | 95% CI (lower limit) | 95% CI (upper limit) | P     | 5 year CIR (%) category 1 | 5 year CIR (%) category 2 |                                    |
| pre DLI median Age                        | 76         | Age 54 years or younger  | Age above 54 years     | 38                 | 38                  | 1.55                | 0.89                 | 2.69                 | 0.121 | 43                        | 26                        |                                    |
| Patient sex                               | 76         | Female                   | Male                   | 34                 | 42                  | 1.10                | 0.63                 | 1.90                 | 0.744 | 38                        | 31                        |                                    |
| Diagnosis                                 | 76         | De novo AML              | sAML / tAML / MDS/AML  | 44                 | 32                  | 1.07                | 0.62                 | 1.86                 | 0.804 | 36                        | 32                        |                                    |
| Extramedullary manifestation at diagnosis | 76         | No                       | Yes                    | 68                 | 8                   | 2.48                | 1.11                 | 5.57                 | 0.028 | 37                        | NA                        | 1                                  |
| FAB subtype                               | 51         | M0 + M1 + M2             | M4 + M5 + M6 + M7      | 29                 | 22                  | 1.76                | 0.91                 | 3.40                 | 0.094 | 38                        | 24                        | 2                                  |
| FLT3-ITD status at diagnosis              | 75         | No                       | Yes                    | 59                 | 16                  | 0.74                | 0.37                 | 1.49                 | 0.403 | 34                        | 36                        |                                    |
| Complex karyotype                         | 75         | No                       | Yes                    | 64                 | 11                  | 2.66                | 1.30                 | 5.44                 | 0.007 | 39                        | NA                        | 3                                  |
| 2017 ELN risk group                       | 70         | Favorable + Intermediate | Adverse                | 34                 | 36                  | 1.54                | 0.88                 | 2.71                 | 0.134 | 40                        | 25                        |                                    |
| MRC Grimwade                              | 75         | Favorable + Intermediate | Adverse                | 56                 | 19                  | 2.06                | 1.12                 | 3.77                 | 0.020 | 41                        | 16                        | 4                                  |
| ECOG performance status at diagnosis      | 76         | ECOG 0                   | ECOG 1                 | 70                 | 6                   | 1.82                | 0.72                 | 4.60                 | 0.204 | 34                        | 33                        |                                    |
| HCT-CI at diagnosis                       | 76         | 0-2                      | >2                     | 67                 | 9                   | 1.30                | 0.58                 | 2.89                 | 0.525 | 34                        | 33                        |                                    |

|                                               |    |                          |                         |    |    |      |      |      |       |    |    |   |
|-----------------------------------------------|----|--------------------------|-------------------------|----|----|------|------|------|-------|----|----|---|
| WBC count at diagnosis                        | 50 | Median or less           | Above median            | 24 | 26 | 1.11 | 0.55 | 2.22 | 0.774 | 40 | 40 |   |
| Hemoglobin at diagnosis                       | 50 | Median or less           | Above median            | 24 | 26 | 0.99 | 0.49 | 1.99 | 0.981 | 46 | 35 |   |
| Platelet count at diagnosis                   | 49 | Median or less           | Above median            | 25 | 24 | 1.60 | 0.80 | 3.20 | 0.188 | 44 | 34 |   |
| Number of chemotherapy cycles before alloHCT1 | 76 | 0-1 cycles               | ≥2                      | 11 | 65 | 1.73 | 0.74 | 4.05 | 0.208 | 55 | 31 |   |
| Donor match at alloHCT1                       | 76 | MRD                      | MUD                     | 25 | 36 | 1.55 | 0.84 | 2.87 | 0.162 | 40 | 24 |   |
| Donor match at alloHCT1                       | 76 | MRD                      | MMRD or MMUD            | 25 | 15 | 0.80 | 0.34 | 1.87 | 0.606 | 40 | 24 |   |
| Conditioning therapy alloHCT1                 | 76 | Myeloablative            | Reduced intensity       | 23 | 53 | 1.17 | 0.63 | 2.20 | 0.616 | 46 | 30 |   |
| Stem cell source at alloHCT1                  | 76 | PB                       | BM                      | 64 | 12 | 1.08 | 0.52 | 2.21 | 0.838 | 34 | 33 |   |
| Donor sex alloHCT1                            | 76 | Female                   | Male                    | 33 | 43 | 1.21 | 0.69 | 2.12 | 0.502 | 39 | 31 |   |
| Donor age alloHCT1                            | 75 | Age 36 years or younger  | Age above 36 years      | 38 | 37 | 0.58 | 0.33 | 1.02 | 0.059 | 21 | 45 | 5 |
| CMV status alloHCT1                           | 75 | Patient neg. /Donor neg. | Any other constellation | 26 | 49 | 1.20 | 0.67 | 2.18 | 0.539 | 42 | 27 |   |
| Epigenetic modifier pre DLI                   | 76 | Wildtype                 | Mutated                 | 52 | 24 | 1.44 | 0.82 | 2.52 | 0.199 | 39 | 25 |   |
| Nucleophosmin                                 | 76 | Wildtype                 | Mutated                 | 72 | 4  | 0.99 | 0.31 | 3.20 | 0.992 | 35 | NA |   |
| Cohesin complex                               | 76 | Wildtype                 | Mutated                 | 73 | 3  | 1.85 | 0.57 | 5.98 | 0.303 | 35 | NA |   |

|                                                 |    |                       |                     |    |    |      |      |       |        |    |    |   |
|-------------------------------------------------|----|-----------------------|---------------------|----|----|------|------|-------|--------|----|----|---|
| Signal transduction                             | 76 | Wildtype              | Mutated             | 65 | 11 | 2.35 | 1.16 | 4.75  | 0.017  | 39 | NA | 6 |
| Spliceosome                                     | 76 | Wildtype              | Mutated             | 67 | 9  | 1.47 | 0.66 | 3.28  | 0.351  | 36 | NA |   |
| Myeloid<br>Transcription factor                 | 76 | Wildtype              | Mutated             | 59 | 17 | 1.58 | 0.85 | 2.93  | 0.146  | 40 | 10 |   |
| Tumor suppressor                                | 76 | Wildtype              | Mutated             | 65 | 11 | 2.29 | 1.13 | 4.63  | 0.021  | 37 | 18 | 7 |
| DRI Score grouped                               | 76 | Low +<br>intermediate | High + very<br>high | 47 | 29 | 1.45 | 0.84 | 2.52  | 0.184  | 38 | 28 |   |
| no CR vs CR and<br>MRD negative                 | 61 | CR/CRi +<br>MRD neg   | noCR/CRi<br>CR/CRi  | 23 | 38 | 5.57 | 2.49 | 12.48 | <0.001 | 70 | 8  |   |
| CR and MRD+ vs CR<br>and MRD-                   | 38 | CR/CRi +<br>MRD neg   | CR/CRi +<br>MRD pos | 23 | 15 | 3.00 | 1.20 | 7.53  | 0.019  | 70 | 40 |   |
| No response or<br>CR/CRi MRD+ vs<br>CR/CRi MRD- | 76 | CR/CRi +<br>MRD-      | All others          | 23 | 53 | 4.67 | 2.16 | 10.07 | <0.001 | 70 | 17 | 8 |

|                                                        |   |
|--------------------------------------------------------|---|
| Number of selected variables for multivariate analysis | 8 |
|--------------------------------------------------------|---|

| Variables | N<br>patients | First<br>category<br>(name) | Second<br>category<br>(name) | First<br>category<br>(n) | Second<br>category<br>(n) | Overall survival |                            |                            |   |                                 |                                 | Selected<br>for<br>multivariate<br>analysis |
|-----------|---------------|-----------------------------|------------------------------|--------------------------|---------------------------|------------------|----------------------------|----------------------------|---|---------------------------------|---------------------------------|---------------------------------------------|
|           |               |                             |                              |                          |                           | HR#              | 95% CI<br>(lower<br>limit) | 95% CI<br>(upper<br>limit) | P | 5 year NRM<br>(%) category<br>1 | 5 year NRM<br>(%) category<br>2 |                                             |

|                                           |    |                          |                       |    |    |      |      |      |       |    |    |   |
|-------------------------------------------|----|--------------------------|-----------------------|----|----|------|------|------|-------|----|----|---|
| pre DLI median Age                        | 76 | Age 54 years or younger  | Age above 54 years    | 38 | 38 | 1.69 | 0.96 | 2.99 | 0.069 | 42 | 28 | 1 |
| Patient sex                               | 76 | Female                   | Male                  | 34 | 42 | 1.19 | 0.67 | 2.11 | 0.548 | 38 | 32 |   |
| Diagnosis                                 | 76 | De novo AML              | sAML / tAML / MDS/AML | 44 | 32 | 1.13 | 0.64 | 1.98 | 0.682 | 36 | 34 |   |
| Extramedullary manifestation at diagnosis | 76 | No                       | Yes                   | 68 | 8  | 2.89 | 1.28 | 6.56 | 0.011 | 37 | NA | 2 |
| FAB subtype                               | 51 | M0 + M1 + M2             | M4 + M5 + M6 + M7     | 29 | 22 | 1.48 | 0.75 | 2.94 | 0.259 | 38 | 27 |   |
| FLT3-ITD status at diagnosis              | 75 | No                       | Yes                   | 59 | 16 | 0.79 | 0.39 | 1.58 | 0.500 | 36 | 34 |   |
| Complex karyotype                         | 75 | No                       | Yes                   | 64 | 11 | 3.10 | 1.50 | 6.40 | 0.002 | 40 | NA | 3 |
| 2017 ELN risk group                       | 70 | Favorable + Intermediate | Adverse               | 34 | 36 | 1.74 | 0.97 | 3.14 | 0.065 | 41 | 26 | 4 |
| MRC Grimwade                              | 75 | Favorable + Intermediate | Adverse               | 56 | 19 | 2.35 | 1.27 | 4.36 | 0.007 | 43 | 11 | 5 |
| ECOG performance status at diagnosis      | 76 | ECOG 0                   | ECOG 1                | 70 | 6  | 1.66 | 0.60 | 4.64 | 0.332 | 35 | 33 |   |
| HCT-CI at diagnosis                       | 76 | 0-2                      | >2                    | 67 | 9  | 1.11 | 0.47 | 2.61 | 0.815 | 35 | 33 |   |
| WBC count at diagnosis                    | 50 | Median or less           | Above median          | 24 | 26 | 1.08 | 0.52 | 2.24 | 0.839 | 41 | 42 |   |
| Hemoglobin at diagnosis                   | 50 | Median or less           | Above median          | 24 | 26 | 1.15 | 0.55 | 2.39 | 0.708 | 49 | 37 |   |

|                                               |    |                          |                         |    |    |      |      |      |       |    |    |   |
|-----------------------------------------------|----|--------------------------|-------------------------|----|----|------|------|------|-------|----|----|---|
| Platelet count at diagnosis                   | 49 | Median or less           | Above median            | 25 | 24 | 1.36 | 0.66 | 2.83 | 0.404 | 45 | 36 |   |
| Number of chemotherapy cycles before alloHCT1 | 76 | 0-1 cycles               | ≥2                      | 11 | 65 | 1.90 | 0.75 | 4.80 | 0.174 | 58 | 31 |   |
| Donor match at alloHCT1                       | 76 | MRD                      | MUD                     | 25 | 36 | 1.67 | 0.89 | 3.15 | 0.112 | 37 | 26 | 6 |
| Donor match at alloHCT1                       | 76 | MRD                      | MMRD or MMUD            | 25 | 15 | 0.70 | 0.29 | 1.72 | 0.436 | 37 | 26 | 6 |
| Conditioning therapy alloHCT1                 | 76 | Myeloablative            | Reduced intensity       | 23 | 53 | 1.30 | 0.68 | 2.49 | 0.434 | 44 | 31 |   |
| Stem cell source at alloHCT1                  | 76 | PB                       | BM                      | 64 | 12 | 0.91 | 0.43 | 1.94 | 0.810 | 36 | 29 |   |
| Donor sex alloHCT1                            | 76 | Female                   | Male                    | 33 | 43 | 1.03 | 0.58 | 1.83 | 0.909 | 37 | 33 |   |
| Donor age alloHCT1                            | 75 | Age 36 years or younger  | Age above 36 years      | 38 | 37 | 0.56 | 0.32 | 1.00 | 0.050 | 21 | 45 | 7 |
| CMV status alloHCT1                           | 75 | Patient neg. /Donor neg. | Any other constellation | 26 | 49 | 1.18 | 0.64 | 2.17 | 0.594 | 46 | 27 |   |
| Epigenetic modifier pre DLI                   | 76 | Wildtype                 | Mutated                 | 52 | 24 | 1.37 | 0.77 | 2.45 | 0.287 | 40 | 25 |   |
| Nucleophosmin                                 | 76 | Wildtype                 | Mutated                 | 72 | 4  | 1.23 | 0.38 | 4.00 | 0.725 | 36 | NA |   |
| Cohesin complex                               | 76 | Wildtype                 | Mutated                 | 73 | 3  | 1.14 | 0.28 | 4.71 | 0.857 | 35 | NA |   |
| Signal transduction                           | 76 | Wildtype                 | Mutated                 | 65 | 11 | 2.87 | 1.39 | 5.90 | 0.004 | 40 | NA | 8 |
| Spliceosome                                   | 76 | Wildtype                 | Mutated                 | 67 | 9  | 1.11 | 0.47 | 2.62 | 0.806 | 35 | 33 |   |
| Myeloid Transcription factor                  | 76 | Wildtype                 | Mutated                 | 59 | 17 | 1.79 | 0.96 | 3.36 | 0.068 | 41 | 9  | 9 |

|                                                        |    |                    |                  |    |    |      |      |       |        |    |    |    |
|--------------------------------------------------------|----|--------------------|------------------|----|----|------|------|-------|--------|----|----|----|
| Tumor suppressor                                       | 76 | Wildtype           | Mutated          | 65 | 11 | 2.66 | 1.31 | 5.38  | 0.007  | 38 | 18 | 10 |
| DRI Score grouped                                      | 76 | Low + intermediate | High + very high | 47 | 29 | 1.60 | 0.91 | 2.83  | 0.103  | 38 | 30 |    |
| no CR vs CR and MRD negative                           | 61 | CR/CRi + MRD neg   | noCR/CRi CR/CRi  | 23 | 38 | 5.67 | 2.45 | 13.1  | <0.001 | 69 | 12 |    |
| CR and MRD positive vs CR and MRD negative             | 38 | CR/CRi + MRD neg   | CR/CRi + MRD pos | 23 | 15 | 3.05 | 1.15 | 8.06  | 0.025  | 69 | 34 |    |
| No response or CR/CRi MRD+ vs CR/CRi MRD-              | 76 | CR/CRi + MRD-      | All others       | 23 | 53 | 4.77 | 2.12 | 10.74 | <0.001 | 69 | 19 | 11 |
|                                                        |    |                    |                  |    |    |      |      |       |        |    |    |    |
| Number of selected variables for multivariate analysis |    |                    |                  |    |    |      |      |       |        |    |    | 11 |

\*\* not considered due to lack of any events

#Hazard ratios greater than or less than 1 indicate an increased or decreased risk, respectively, of an event for the second category listed.

Abbreviations: CI, confidence interval; CMV, cytomegalovirus; CR, complete remission; ECOG, Eastern Cooperative Group performance status; ELN, European LeukemiaNet; HCT, hematopoietic cell transplantation; HCT-CI, hematopoietic cell transplantation comorbidity index; HR, hazard ratio; ITD, internal tandem duplication; MMRD, mismatched related donor; MMUD, mismatched unrelated donor; MRDonor, matched related donor; MUD, matched unrelated donor; MRD, measurable residual disease; MVA, Multivariate analysis; P, P value; WBC, white blood cell count.
