# Supplementary material for: MRD as Biomarker for Response to Donor Lymphocyte Infusion after Allogeneic Hematopoietic Cell Transplantation in Patients with AML
Source: MDPI journal article supplement (doi:10.3390/cancers15153911), 2023-08-01
Supplement: s1 [file s1]

**Supplementary Table S11: Variables for univariate analysis in 34 patients who are in CR/CRi at FU30**

| Variables                                 | N patients | First category (name)    | Second category (name) | First category (n) | Second category (n) | Cumulative incidence of relapse |                      |                      |       |                           |                           | Selected for multivariate analysis |
|-------------------------------------------|------------|--------------------------|------------------------|--------------------|---------------------|---------------------------------|----------------------|----------------------|-------|---------------------------|---------------------------|------------------------------------|
|                                           |            |                          |                        |                    |                     | HR#                             | 95% CI (lower limit) | 95% CI (upper limit) | P     | 5 year CIR (%) category 1 | 5 year CIR (%) category 2 |                                    |
| pre DLI median Age                        | 34         | Age 54 years or younger  | Age above 54 years     | 20                 | 14                  | 0.43                            | 0.12                 | 1.48                 | 0.181 | 40                        | 14                        |                                    |
| Patient sex                               | 34         | Female                   | Male                   | 16                 | 18                  | 0.49                            | 0.14                 | 1.64                 | 0.245 | 38                        | 22                        |                                    |
| Diagnosis                                 | 34         | De novo AML              | sAML / tAML / MDS      | 21                 | 13                  | 1.02                            | 0.28                 | 3.72                 | 0.971 | 29                        | 31                        |                                    |
| Extramedullary manifestation at diagnosis | 34         | No                       | Yes                    | 30                 | 4                   | 0.87                            | 0.09                 | 8.31                 | 0.900 | 30                        | NA                        |                                    |
| FAB subtype                               | 23         | M0 + M1 + M2             | M4 + M5 + M6 + M7      | 18                 | 5                   | 1.28                            | 0.23                 | 7.08                 | 0.775 | 33                        | 40                        |                                    |
| FLT3-ITD status at diagnosis              | 34         | No                       | Yes                    | 27                 | 7                   | 0.38                            | 0.05                 | 2.92                 | 0.350 | 33                        | 14                        |                                    |
| Complex karyotype                         | 34         | No                       | Yes                    | 29                 | 5                   | 3.43                            | 0.87                 | 13.56                | 0.078 | 24                        | NA                        | 1                                  |
| 2022 ELN risk group                       | 31         | Favorable + Intermediate | Adverse                | 15                 | 16                  | 0.76                            | 0.24                 | 2.41                 | 0.641 | 33                        | 31                        |                                    |
| MRC Grimwade                              | 34         | Favorable + Intermediate | Adverse                | 25                 | 9                   | 2.09                            | 0.61                 | 7.20                 | 0.242 | 24                        | 44                        |                                    |
| ECOG performance status at diagnosis      | 34         | ECOG 0                   | ECOG 1                 | 32                 | 2                   | 1.35                            | 0.34                 | 5.39                 | 0.675 | 31                        | 0                         | *                                  |
| HCT-CI at diagnosis                       | 34         | 0-2                      | >2                     | 30                 | 4                   | 1.69                            | 0.41                 | 6.91                 | 0.463 | 30                        | 25                        |                                    |

|                                               |    |                          |                         |    |    |      |      |       |       |    |    |   |
|-----------------------------------------------|----|--------------------------|-------------------------|----|----|------|------|-------|-------|----|----|---|
| WBC count at diagnosis                        | 25 | Median or less           | Above median            | 13 | 12 | 0.57 | 0.15 | 2.17  | 0.408 | 38 | 25 |   |
| Hemoglobin at diagnosis                       | 25 | Median or less           | Above median            | 12 | 13 | 1.29 | 0.37 | 4.56  | 0.687 | 25 | 38 |   |
| Platelet count at diagnosis                   | 25 | Median or less           | Above median            | 16 | 9  | 0.84 | 0.22 | 3.16  | 0.799 | 38 | 22 |   |
| Number of chemotherapy cycles before alloHCT1 | 34 | 0-1 cycles               | ≥2                      | 9  | 25 | 1.87 | 0.42 | 8.27  | 0.409 | 22 | 32 |   |
| Donor match at alloHCT1                       | 34 | MRD                      | MUD                     | 13 | 14 | 0.98 | 0.25 | 3.89  | 0.970 | 31 | 29 |   |
| Donor match at alloHCT1                       | 34 | MRD                      | MMRD or MMUD            | 13 | 7  | 1.37 | 0.34 | 5.52  | 0.660 | 31 | 29 |   |
| Conditioning therapy alloHCT1                 | 34 | Myeloablative            | Reduced intensity       | 9  | 25 | 1.62 | 0.37 | 7.17  | 0.526 | 22 | 32 |   |
| Stem cell source at alloHCT1                  | 34 | PB                       | BM                      | 27 | 7  | 1.51 | 0.44 | 5.23  | 0.512 | 30 | 29 |   |
| Donor sex alloHCT1                            | 34 | Female                   | Male                    | 13 | 21 | 1.09 | 0.33 | 3.58  | 0.881 | 31 | 29 |   |
| Donor age alloHCT1                            | 33 | Age 36 years or younger  | Age above 36 years      | 14 | 19 | 0.96 | 0.31 | 2.99  | 0.948 | 29 | 32 |   |
| CMV status alloHCT1                           | 34 | Patient neg. /Donor neg. | Any other constellation | 12 | 22 | 2.87 | 0.62 | 13.24 | 0.178 | 17 | 36 |   |
| Epigenetic modifier pre DLI                   | 34 | MRD-                     | MRD+                    | 25 | 9  | 1.75 | 0.54 | 5.67  | 0.352 | 28 | 33 |   |
| Nucleophosmin pre DLI                         | 34 | MRD-                     | MRD+                    | 33 | 1  | 0.00 | 0.00 | 0.00  | 0.000 | 30 | NA | * |
| Cohesin complex pre DLI                       | 34 | MRD-                     | MRD+                    | 32 | 2  | 5.84 | 2.26 | 15.10 | 0.000 | 25 | NA | * |

|                                      |    |                    |                  |    |    |      |      |      |       |    |    |   |
|--------------------------------------|----|--------------------|------------------|----|----|------|------|------|-------|----|----|---|
| Signal transduction pre DLI          | 34 | MRD-               | MRD+             | 32 | 2  | 0.00 | 0.00 | 0.00 | 0.000 | 31 | NA | * |
| Spliceosome pre DLI                  | 34 | MRD-               | MRD+             | 31 | 3  | 0.97 | 0.16 | 5.74 | 0.973 | 29 | NA | * |
| Myeloid Transcription factor pre DLI | 34 | MRD-               | MRD+             | 30 | 4  | 0.66 | 0.11 | 4.02 | 0.652 | 30 | 25 |   |
| Tumor suppressor pre DLI             | 34 | MRD-               | MRD+             | 32 | 2  | 0.00 | 0.00 | 0.00 | 0.000 | 31 | 0  | * |
| DRI Score grouped                    | 34 | Low + intermediate | High + very high | 20 | 14 | 1.31 | 0.40 | 4.28 | 0.653 | 25 | 36 |   |
| FU30 MRD status                      | 34 | Negative           | Positive         | 25 | 9  | 2.64 | 0.86 | 8.13 | 0.090 | 24 | 44 | 2 |

|                                                        |   |
|--------------------------------------------------------|---|
| Number of selected variables for multivariate analysis | 2 |
|--------------------------------------------------------|---|

|                    |            |                         |                        |                    |                     | Non relapse mortality |                      |                      |       |                           |                           | Selected for multivariate analysis |
|--------------------|------------|-------------------------|------------------------|--------------------|---------------------|-----------------------|----------------------|----------------------|-------|---------------------------|---------------------------|------------------------------------|
| Variables          | N patients | First category (name)   | Second category (name) | First category (n) | Second category (n) | HR#                   | 95% CI (lower limit) | 95% CI (upper limit) | P     | 5 year NRM (%) category 1 | 5 year NRM (%) category 2 |                                    |
| pre DLI median Age | 34         | Age 54 years or younger | Age above 54 years     | 20                 | 14                  | 3.78                  | 0.76                 | 18.9                 | 0.105 | 10                        | 29                        | 1                                  |
| Patient sex        | 34         | Female                  | Male                   | 16                 | 18                  | 1.14                  | 0.26                 | 4.91                 | 0.865 | 20                        | 17                        |                                    |
| Diagnosis          | 34         | De novo AML             | sAML / tAML / MDS      | 21                 | 13                  | 1.19                  | 0.29                 | 4.93                 | 0.815 | 19                        | 15                        |                                    |

|                                               |    |                          |                   |    |    |      |      |      |       |    |    |   |
|-----------------------------------------------|----|--------------------------|-------------------|----|----|------|------|------|-------|----|----|---|
| Extramedullary manifestation at diagnosis     | 34 | No                       | Yes               | 30 | 4  | 5.21 | 0.89 | 30.4 | 0.066 | 14 | NA | 2 |
| FAB subtype                                   | 23 | M0 + M1 + M2             | M4 + M5 + M6 + M7 | 18 | 5  | 1.16 | 0.14 | 9.73 | 0.890 | 17 | 20 |   |
| FLT3-ITD status at diagnosis                  | 34 | No                       | Yes               | 27 | 7  | 1.71 | 0.35 | 8.25 | 0.504 | 15 | 29 |   |
| Complex karyotype                             | 34 | No                       | Yes               | 29 | 5  | 1.09 | 0.14 | 8.78 | 0.935 | 17 | NA |   |
| 2022 ELN risk group                           | 31 | Favorable + Intermediate | Adverse           | 15 | 16 | 2.78 | 0.61 | 12.8 | 0.188 | 13 | 25 |   |
| MRC Grimwade                                  | 34 | Favorable + Intermediate | Adverse           | 25 | 9  | 1.27 | 0.26 | 6.16 | 0.767 | 16 | 22 |   |
| ECOG performance status at diagnosis          | 34 | ECOG 0                   | ECOG 1            | 32 | 2  | 0.00 | 0.00 | 0.00 | 0.000 | 19 | 0  | * |
| HCT-CI at diagnosis                           | 34 | 0-2                      | >2                | 30 | 4  | 1.34 | 0.15 | 12.2 | 0.796 | 17 | 25 |   |
| WBC count at diagnosis                        | 25 | Median or less           | Above median      | 13 | 12 | 1.96 | 0.38 | 10.2 | 0.425 | 8  | 25 |   |
| Hemoglobin at diagnosis                       | 25 | Median or less           | Above median      | 12 | 13 | 0.58 | 0.10 | 3.39 | 0.548 | 17 | 15 |   |
| Platelet count at diagnosis                   | 25 | Median or less           | Above median      | 16 | 9  | 1.26 | 0.22 | 7.33 | 0.796 | 12 | 22 |   |
| Number of chemotherapy cycles before alloHCT1 | 34 | 0-1 cycles               | ≥2                | 9  | 25 | 0.45 | 0.11 | 1.85 | 0.269 | 22 | 16 |   |
| Donor match at alloHCT1                       | 34 | MRD                      | MUD               | 13 | 14 | 2.53 | 0.51 | 12.6 | 0.260 | 15 | 30 |   |

|                                      |    |                          |                         |    |    |      |      |      |       |    |    |   |
|--------------------------------------|----|--------------------------|-------------------------|----|----|------|------|------|-------|----|----|---|
| Donor match at alloHCT1              | 34 | MRD                      | MMRD or MMUD            | 13 | 7  | 0.00 | 0.00 | 0.00 | 0.000 | 15 | 30 | * |
| Conditioning therapy alloHCT1        | 34 | Myeloablative            | Reduced intensity       | 9  | 25 | 2.02 | 0.23 | 17.7 | 0.525 | 11 | 20 |   |
| Stem cell source at alloHCT1         | 34 | PB                       | BM                      | 27 | 7  | 0.59 | 0.08 | 4.54 | 0.613 | 19 | 14 |   |
| Donor sex alloHCT1                   | 34 | Female                   | Male                    | 13 | 21 | 1.41 | 0.27 | 7.33 | 0.685 | 15 | 19 |   |
| Donor age alloHCT1                   | 33 | Age 36 years or younger  | Age above 36 years      | 14 | 19 | 0.28 | 0.05 | 1.50 | 0.138 | 30 | 11 |   |
| CMV status alloHCT1                  | 34 | Patient neg. /Donor neg. | Any other constellation | 12 | 22 | 1.52 | 0.32 | 7.27 | 0.599 | 8  | 24 |   |
| Epigenetic modifier pre DLI          | 34 | MRD-                     | MRD+                    | 25 | 9  | 2.21 | 0.53 | 9.19 | 0.275 | 12 | 33 |   |
| Nucleophosmin pre DLI                | 34 | MRD-                     | MRD+                    | 33 | 1  | 5.96 | 2.53 | 14.0 | 0.000 | 15 | NA | * |
| Cohesin complex pre DLI              | 34 | MRD-                     | MRD+                    | 32 | 2  | 0.00 | 0.00 | 0.00 | 0.000 | 19 | NA | * |
| Signal transduction pre DLI          | 34 | MRD-                     | MRD+                    | 32 | 2  | 9.09 | 3.14 | 26.3 | 0.000 | 12 | NA | * |
| Spliceosome pre DLI                  | 34 | MRD-                     | MRD+                    | 31 | 3  | 1.98 | 0.27 | 14.6 | 0.501 | 17 | NA | * |
| Myeloid Transcription factor pre DLI | 34 | MRD-                     | MRD+                    | 30 | 4  | 0.00 | 0.00 | 0.00 | 0.000 | 20 | 0  | * |
| Tumor suppressor pre DLI             | 34 | MRD-                     | MRD+                    | 32 | 2  | 8.09 | 2.71 | 24.2 | 0.000 | 16 | 50 | * |
| DRI Score grouped                    | 34 | Low + intermediate       | High + very high        | 20 | 14 | 2.02 | 0.48 | 8.50 | 0.338 | 15 | 21 |   |

|                 |    |          |          |    |   |      |      |      |       |    |    |  |
|-----------------|----|----------|----------|----|---|------|------|------|-------|----|----|--|
| FU30 MRD status | 34 | Negative | Positive | 25 | 9 | 1.04 | 0.22 | 4.88 | 0.961 | 21 | 11 |  |
|-----------------|----|----------|----------|----|---|------|------|------|-------|----|----|--|

|                                                        |   |
|--------------------------------------------------------|---|
| Number of selected variables for multivariate analysis | 2 |
|--------------------------------------------------------|---|

| Variables                                 | N patients | First category (name)    | Second category (name) | First category (n) | Second category (n) | Relapse free survival |                      |                      |       |                           |                           | Selected for multivariate analysis |
|-------------------------------------------|------------|--------------------------|------------------------|--------------------|---------------------|-----------------------|----------------------|----------------------|-------|---------------------------|---------------------------|------------------------------------|
|                                           |            |                          |                        |                    |                     | HR#                   | 95% CI (lower limit) | 95% CI (upper limit) | P     | 5 year RFS (%) category 1 | 5 year RFS (%) category 2 |                                    |
| pre DLI median Age                        | 34         | Age 54 years or younger  | Age above 54 years     | 20                 | 14                  | 1.03                  | 0.40                 | 2.61                 | 0.956 | 50                        | 56                        |                                    |
| Patient sex                               | 34         | Female                   | Male                   | 16                 | 18                  | 0.66                  | 0.26                 | 1.68                 | 0.387 | 43                        | 61                        |                                    |
| Diagnosis                                 | 34         | De novo AML              | sAML / tAML / MDS      | 21                 | 13                  | 1.18                  | 0.45                 | 3.06                 | 0.738 | 52                        | 54                        |                                    |
| Extramedullary manifestation at diagnosis | 34         | No                       | Yes                    | 30                 | 4                   | 4.45                  | 1.25                 | 15.91                | 0.021 | 56                        | NA                        |                                    |
| FAB subtype                               | 23         | M0 + M1 + M2             | M4 + M5 + M6 + M7      | 18                 | 5                   | 1.38                  | 0.38                 | 5.04                 | 0.626 | 49                        | 40                        |                                    |
| FLT3-ITD status at diagnosis              | 34         | No                       | Yes                    | 27                 | 7                   | 0.78                  | 0.22                 | 2.72                 | 0.696 | 52                        | 57                        |                                    |
| Complex karyotype                         | 34         | No                       | Yes                    | 29                 | 5                   | 3.47                  | 1.08                 | 11.16                | 0.037 | 58                        | NA                        | 1                                  |
| 2022 ELN risk group                       | 31         | Favorable + Intermediate | Adverse                | 15                 | 16                  | 1.47                  | 0.58                 | 3.74                 | 0.417 | 53                        | 44                        |                                    |
| MRC Grimwade                              | 34         | Favorable + Intermediate | Adverse                | 25                 | 9                   | 2.26                  | 0.83                 | 6.18                 | 0.111 | 60                        | 33                        |                                    |

|                                               |    |                          |                         |    |    |      |      |      |       |    |     |   |
|-----------------------------------------------|----|--------------------------|-------------------------|----|----|------|------|------|-------|----|-----|---|
| ECOG performance status at diagnosis          | 34 | ECOG 0                   | ECOG 1                  | 32 | 2  | 0.63 | 0.08 | 4.79 | 0.659 | 50 | 100 | * |
| HCT–CI at diagnosis                           | 34 | 0-2                      | >2                      | 30 | 4  | 1.76 | 0.50 | 6.18 | 0.374 | 53 | 50  |   |
| WBC count at diagnosis                        | 25 | Median or less           | Above median            | 13 | 12 | 1.03 | 0.35 | 3.03 | 0.951 | 54 | 50  |   |
| Hemoglobin at diagnosis                       | 25 | Median or less           | Above median            | 12 | 13 | 1.02 | 0.36 | 2.93 | 0.970 | 58 | 46  |   |
| Platelet count at diagnosis                   | 25 | Median or less           | Above median            | 16 | 9  | 1.03 | 0.34 | 3.10 | 0.954 | 50 | 56  |   |
| Number of chemotherapy cycles before alloHCT1 | 34 | 0-1 cycles               | ≥2                      | 9  | 25 | 0.96 | 0.34 | 2.71 | 0.945 | 56 | 52  |   |
| Donor match at alloHCT1                       | 34 | MRD                      | MUD                     | 13 | 14 | 1.70 | 0.60 | 4.84 | 0.318 | 54 | 42  |   |
| Donor match at alloHCT1                       | 34 | MRD                      | MMRD or MMUD            | 13 | 7  | 0.80 | 0.20 | 3.19 | 0.747 | 54 | 42  |   |
| Conditioning therapy alloHCT1                 | 34 | Myeloablative            | Reduced intensity       | 9  | 25 | 1.86 | 0.54 | 6.43 | 0.330 | 67 | 48  |   |
| Stem cell source at alloHCT1                  | 34 | PB                       | BM                      | 27 | 7  | 1.03 | 0.34 | 3.15 | 0.954 | 51 | 57  |   |
| Donor sex alloHCT1                            | 34 | Female                   | Male                    | 13 | 21 | 1.19 | 0.44 | 3.17 | 0.731 | 54 | 52  |   |
| Donor age alloHCT1                            | 33 | Age 36 years or younger  | Age above 36 years      | 14 | 19 | 0.57 | 0.22 | 1.44 | 0.235 | 42 | 58  |   |
| CMV status alloHCT1                           | 34 | Patient neg. /Donor neg. | Any other constellation | 12 | 22 | 2.57 | 0.84 | 7.87 | 0.098 | 75 | 40  | 2 |
| Epigenetic modifier pre DLI                   | 34 | MRD-                     | MRD+                    | 25 | 9  | 2.21 | 0.85 | 5.72 | 0.102 | 60 | 33  |   |

|                                      |    |                    |                  |    |    |      |      |       |       |    |    |   |
|--------------------------------------|----|--------------------|------------------|----|----|------|------|-------|-------|----|----|---|
| Nucleophosmin pre DLI                | 34 | MRD-               | MRD+             | 33 | 1  | 1.63 | 0.21 | 12.37 | 0.637 | 55 | NA | * |
| Cohesin complex pre DLI              | 34 | MRD-               | MRD+             | 32 | 2  | 2.82 | 0.63 | 12.67 | 0.176 | 56 | NA | * |
| Signal transduction pre DLI          | 34 | MRD-               | MRD+             | 32 | 2  | 2.54 | 0.57 | 11.21 | 0.220 | 56 | NA | * |
| Spliceosome pre DLI                  | 34 | MRD-               | MRD+             | 31 | 3  | 1.52 | 0.34 | 6.71  | 0.581 | 54 | NA | * |
| Myeloid Transcription factor pre DLI | 34 | MRD-               | MRD+             | 30 | 4  | 0.35 | 0.05 | 2.63  | 0.306 | 50 | 75 |   |
| Tumor suppressor pre DLI             | 34 | MRD-               | MRD+             | 32 | 2  | 2.50 | 0.57 | 11.01 | 0.224 | 53 | 50 | * |
| DRI Score grouped                    | 34 | Low + intermediate | High + very high | 20 | 14 | 1.86 | 0.74 | 4.71  | 0.189 | 60 | 43 |   |
| FU30 MRD status                      | 34 | Negative           | Positive         | 25 | 9  | 2.00 | 0.77 | 5.17  | 0.154 | 55 | 44 | 3 |

|                                                        |   |
|--------------------------------------------------------|---|
| Number of selected variables for multivariate analysis | 3 |
|--------------------------------------------------------|---|

| Variables | N patients | First category (name) | Second category (name) | First category (n) | Second category (n) | Overall survival |                      |                      |   |                          |                          | Selected for multivariate analysis |
|-----------|------------|-----------------------|------------------------|--------------------|---------------------|------------------|----------------------|----------------------|---|--------------------------|--------------------------|------------------------------------|
|           |            |                       |                        |                    |                     | HR#              | 95% CI (lower limit) | 95% CI (upper limit) | P | 5 year OS (%) category 1 | 5 year OS (%) category 2 |                                    |



|                                           |    |                          |                    |    |    |      |      |       |       |    |     |   |
|-------------------------------------------|----|--------------------------|--------------------|----|----|------|------|-------|-------|----|-----|---|
| pre DLI median Age                        | 34 | Age 54 years or younger  | Age above 54 years | 20 | 14 | 0.86 | 0.31 | 2.37  | 0.769 | 46 | 62  |   |
| Patient sex                               | 34 | Female                   | Male               | 16 | 18 | 0.83 | 0.31 | 2.22  | 0.713 | 45 | 60  |   |
| Diagnosis                                 | 34 | De novo AML              | sAML / tAML / MDS  | 21 | 13 | 1.34 | 0.50 | 3.63  | 0.559 | 53 | 53  |   |
| Extramedullary manifestation at diagnosis | 34 | No                       | Yes                | 30 | 4  | 5.10 | 1.39 | 18.67 | 0.014 | 57 | NA  | 1 |
| FAB subtype                               | 23 | M0 + M1 + M2             | M4 + M5 + M6 + M7  | 18 | 5  | 1.40 | 0.37 | 5.28  | 0.621 | 49 | 40  |   |
| FLT3-ITD status at diagnosis              | 34 | No                       | Yes                | 27 | 7  | 0.83 | 0.24 | 2.92  | 0.771 | 53 | 48  |   |
| Complex karyotype                         | 34 | No                       | Yes                | 29 | 5  | 4.91 | 1.36 | 17.68 | 0.015 | 60 | NA  | 2 |
| 2022 ELN risk group                       | 31 | Favorable + Intermediate | Adverse            | 15 | 16 | 2.02 | 0.73 | 5.58  | 0.175 | 57 | 40  |   |
| MRC Grimwade                              | 34 | Favorable + Intermediate | Adverse            | 25 | 9  | 2.87 | 1.00 | 8.26  | 0.050 | 62 | 22  | 3 |
| ECOG performance status at diagnosis      | 34 | ECOG 0                   | ECOG 1             | 32 | 2  | 0.00 | 0.00 | 0.00  | 0.998 | 50 | 100 | * |
| HCT-CI at diagnosis                       | 34 | 0-2                      | >2                 | 30 | 4  | 1.25 | 0.28 | 5.51  | 0.771 | 53 | 50  |   |
| WBC count at diagnosis                    | 25 | Median or less           | Above median       | 13 | 12 | 1.30 | 0.42 | 4.04  | 0.654 | 58 | 49  |   |
| Hemoglobin at diagnosis                   | 25 | Median or less           | Above median       | 12 | 13 | 1.40 | 0.44 | 4.41  | 0.569 | 64 | 44  |   |
| Platelet count at diagnosis               | 25 | Median or less           | Above median       | 16 | 9  | 0.97 | 0.29 | 3.24  | 0.963 | 51 | 56  |   |

|                                               |    |                          |                         |    |    |      |      |       |       |    |    |   |
|-----------------------------------------------|----|--------------------------|-------------------------|----|----|------|------|-------|-------|----|----|---|
| Number of chemotherapy cycles before alloHCT1 | 34 | 0-1 cycles               | ≥2                      | 9  | 25 | 1.11 | 0.36 | 3.44  | 0.860 | 62 | 50 |   |
| Donor match at alloHCT1                       | 34 | MRD                      | MUD                     | 13 | 14 | 1.63 | 0.56 | 4.71  | 0.370 | 50 | 48 |   |
| Donor match at alloHCT1                       | 34 | MRD                      | MMRD or MMUD            | 13 | 7  | 0.58 | 0.12 | 2.90  | 0.510 | 50 | 48 |   |
| Conditioning therapy alloHCT1                 | 34 | Myeloablative            | Reduced intensity       | 9  | 25 | 1.74 | 0.49 | 6.12  | 0.388 | 59 | 50 |   |
| Stem cell source at alloHCT1                  | 34 | PB                       | BM                      | 27 | 7  | 0.71 | 0.20 | 2.50  | 0.596 | 53 | 51 |   |
| Donor sex alloHCT1                            | 34 | Female                   | Male                    | 13 | 21 | 1.01 | 0.37 | 2.78  | 0.985 | 47 | 55 |   |
| Donor age alloHCT1                            | 33 | Age 36 years or younger  | Age above 36 years      | 14 | 19 | 0.68 | 0.25 | 1.80  | 0.434 | 45 | 56 |   |
| CMV status alloHCT1                           | 34 | Patient neg. /Donor neg. | Any other constellation | 12 | 22 | 3.19 | 0.90 | 11.29 | 0.072 | 83 | 35 | 4 |
| Epigenetic modifier pre DLI                   | 34 | MRD-                     | MRD+                    | 25 | 9  | 1.94 | 0.70 | 5.35  | 0.202 | 61 | 33 |   |
| Nucleophosmin pre DLI                         | 34 | MRD-                     | MRD+                    | 33 | 1  | 2.39 | 0.31 | 18.58 | 0.404 | 55 | NA | * |
| Cohesin complex pre DLI                       | 34 | MRD-                     | MRD+                    | 32 | 2  | 1.21 | 0.16 | 9.32  | 0.855 | 54 | NA | * |
| Signal transduction pre DLI                   | 34 | MRD-                     | MRD+                    | 32 | 2  | 3.85 | 0.84 | 17.70 | 0.083 | 57 | NA | * |
| Spliceosome pre DLI                           | 34 | MRD-                     | MRD+                    | 31 | 3  | 0.89 | 0.12 | 6.75  | 0.906 | 52 | NA | * |
| Myeloid Transcription factor pre DLI          | 34 | MRD-                     | MRD+                    | 30 | 4  | 0.50 | 0.07 | 3.82  | 0.505 | 52 | 67 |   |

|                          |    |                    |                  |    |    |      |      |       |       |    |    |   |
|--------------------------|----|--------------------|------------------|----|----|------|------|-------|-------|----|----|---|
| Tumor suppressor pre DLI | 34 | MRD-               | MRD+             | 32 | 2  | 2.66 | 0.60 | 11.75 | 0.198 | 53 | 50 | * |
| DRI Score grouped        | 34 | Low + intermediate | High + very high | 20 | 14 | 2.00 | 0.75 | 5.38  | 0.168 | 57 | 50 |   |
| FU30 MRD status          | 34 | Negative           | Positive         | 25 | 9  | 1.20 | 0.42 | 3.46  | 0.737 | 54 | 52 |   |

|                                                        |   |
|--------------------------------------------------------|---|
| Number of selected variables for multivariate analysis | 4 |
|--------------------------------------------------------|---|

\* not considered due to lack of any events or too few patients in one of the categories

#Hazard ratios greater than or less than 1 indicate an increased or decreased risk, respectively, of an event for the second category listed.

Abbreviations: CI, confidence interval; CMV, cytomegalovirus; CR, complete remission; ECOG, Eastern Cooperative Group performance status; ELN, European LeukemiaNet; HCT, hematopoietic cell transplantation; HCT-CI, hematopoietic cell transplantation comorbidity index; HR, hazard ratio; ITD, internal tandem duplication; MMRD, mismatched related donor; MMUD, mismatched unrelated donor; MRDonor, matched related donor; MUD, matched unrelated donor; MVA, multivariate analysis; MRD, measurable residual disease; P, P value; WBC, white blood cell count.
